# Supplementary material for: Insight into the reaction between a primary amine and a cavitand with an introverted aldehyde group: an enzyme-like mechanism
Source: Royal Society of Chemistry journal article supplement (doi:10.1039/c2cc38165f), 2013-01-01
Supplement: c2cc38165f.pdf [file c2cc38165f.pdf]

## Electronic Supplementary Information (ESI) for Chemical Communications

### Insights into the Reaction between a Primary Amine and a Cavitand with an Introverted Aldehyde Group: An Enzyme-like Mechanism

Lina Xu<sup>ab</sup>, Shugui Hua<sup>a</sup> and Shuhua Li<sup>\*a</sup>

<sup>a</sup> Institute of Theoretical and Computational Chemistry, Key Laboratory of Mesoscopic Chemistry of Ministry of Education, School of Chemistry and Chemical Engineering, Nanjing University, Nanjing 210093, P. R. China.

<sup>b</sup> College of Chemistry and Materials Engineering, Wenzhou University, Wenzhou 325035, P. R. China.

#### The supporting information includes:

|                                                                                                                                                                                                  |    |
|--------------------------------------------------------------------------------------------------------------------------------------------------------------------------------------------------|----|
| Computational details.....                                                                                                                                                                       | S2 |
| <b>Figure S1.</b> The optimized geometries of some stationary points in the imine formation.....                                                                                                 | S4 |
| <b>Figure S2.</b> Gibbs free energy profile of the hemiaminal formation (the nucleophilic addition) from isobuylamine and the cavitand with a water molecule as a catalyst in the gas phase..... | S5 |
| Cartesian coordinates of optimized geometries of all the species.....                                                                                                                            | S6 |

### Computational details:

Geometries of stationary points for the studied reaction and the model reaction were fully optimized using the M06-2X functional<sup>S1</sup> with the 6-31G (d,p) basis set implemented in the Gaussian09 program<sup>S2</sup>. Vibrational frequency calculation was carried out for each stationary point to verify whether it is a minimum or a transition state and obtain the thermodynamic data (enthalpy, entropy and Gibbs free energy) at 298.15K and 1atm. All the transition states were verified by intrinsic reaction coordinate (IRC)<sup>S3</sup> calculations. The polarizable-continuum model (PCM)<sup>S4</sup> was employed to compute the solvation Gibbs free energy for each species in the solvent (mesitylene) at its gas-phase optimized structure. To gain more accurate electronic energies, we carried out single point M06-2X calculations for stationary points of the encapsulated reaction and the model reaction. The large cc-pVTZ<sup>S5</sup> basis set was employed for all the atoms.

### References:

- S1 a) Y. Zhao and D. G. Truhlar, *Theor. Chem. Acc.* 2008, **120**, 215; b) Y. Zhao. and D. G. Truhlar, *Acc. Chem. Res.* 2008, **41**, 157.
- S2 Gaussian 09 (Revision A.02) M. J. Frisch, G. W. Trucks, H. B. Schlegel, G. E. Scuseria, M. A. Robb, J. R. Cheeseman, G. Scalmani, V. Barone, B. Mennucci, G. A. Petersson, H. Nakatsuji, M. Caricato, X. Li, H. P. Hratchian, A. F. Izmaylov, J. Bloino, G. Zheng, J. L. Sonnenberg, M. Hada, M. Ehara, K. Toyota, R. Fukuda, J. Hasegawa, M. Ishida, T. Nakajima, Y. Honda, O. Kitao, H. Nakai, T. Vreven, J. A. Montgomery, Jr., J. E. Peralta, F. Ogliaro, M. Bearpark, J. J. Heyd, E. Brothers, K. N. Kudin, V. N. Staroverov, R. Kobayashi, J. Normand, K. Raghavachari, A. Rendell, J. C. Burant, S. S. Iyengar, J. Tomasi, M. Cossi, N. Rega, J. M. Millam, M. Klene, J. E. Knox, J. B. Cross, V. Bakken, C. Adamo, J. Jaramillo, R. Gomperts, R. E. Stratmann, O. Yazyev, A. J. Austin, R. Cammi, C. Pomelli, J. W. Ochterski, R. L. Martin, K. Morokuma, V. G. Zakrzewski, G. A. Voth, P. Salvador, J. J. Dannenberg, S. Dapprich, A. D. Daniels, O. Farkas, J. B. Foresman, J. V. Ortiz, J. Cioslowski and D. J. Fox, Gaussian, Inc.: Wallingford, CT, 2009.
- S3 C. Gonzalez and H. B. Schlegel, *J. Chem. Phys.* 1989, **90**, 2154.

- S4 a) B. Mennucci and J. Tomasi, *J. Chem. Phys.* 1997, **106**, 5151; b) M. Cossi, G. Scalmani, N. Rega and V. Barone, *J. Chem. Phys.* 2002, **117**, 43; c) J. Tomasi, B. Mennucci and R. Cammi, *Chem. Rev.* 2005, **105**, 2999; d) G. Scalmani and M. J. Frisch, *J. Chem. Phys.* 2010, **132**, 114110.
- S5 R. A. Kendall, T. H. Dunning Jr. and R. J. Harrison, *J. Chem. Phys.* 1992, **96**, 6796.

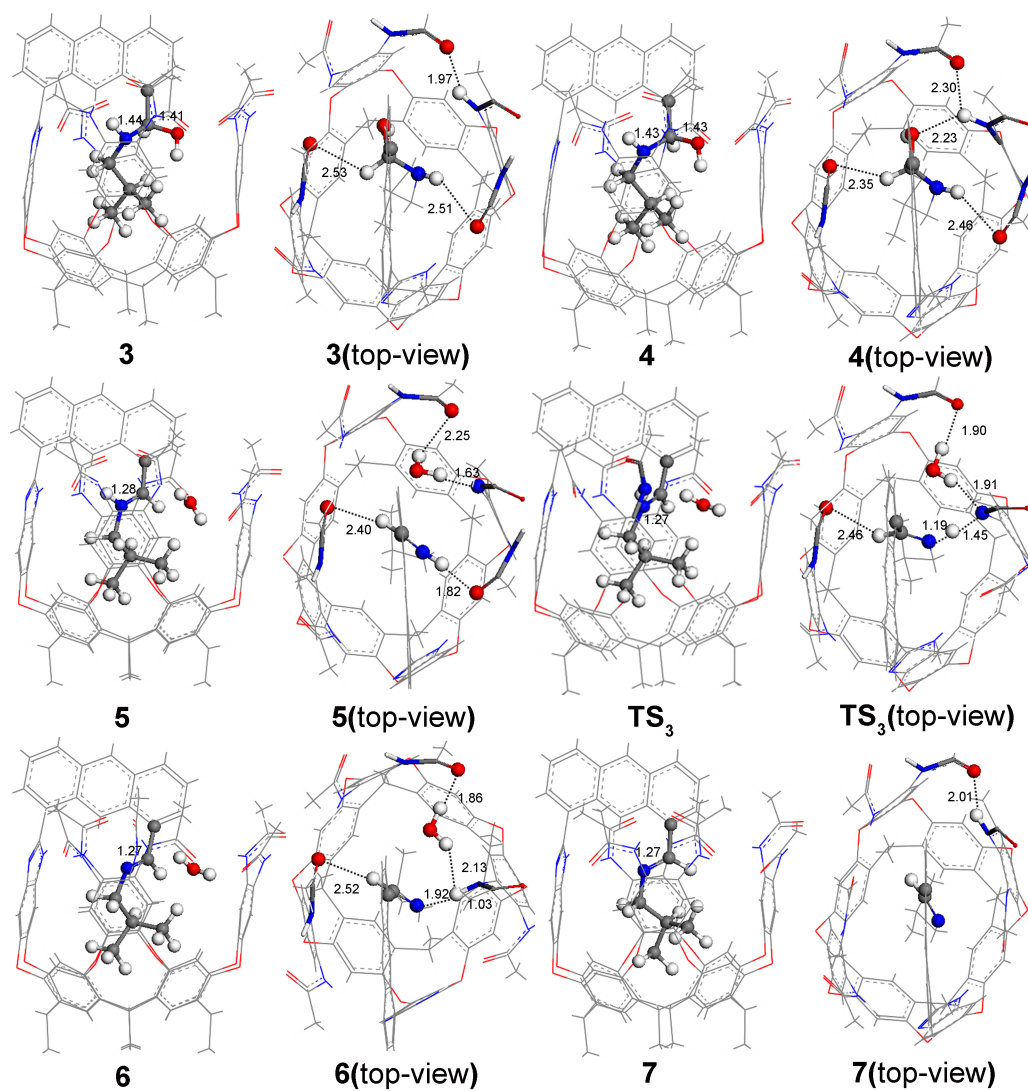

**Figure S1.** The optimized geometries of some stationary points in the imine formation.

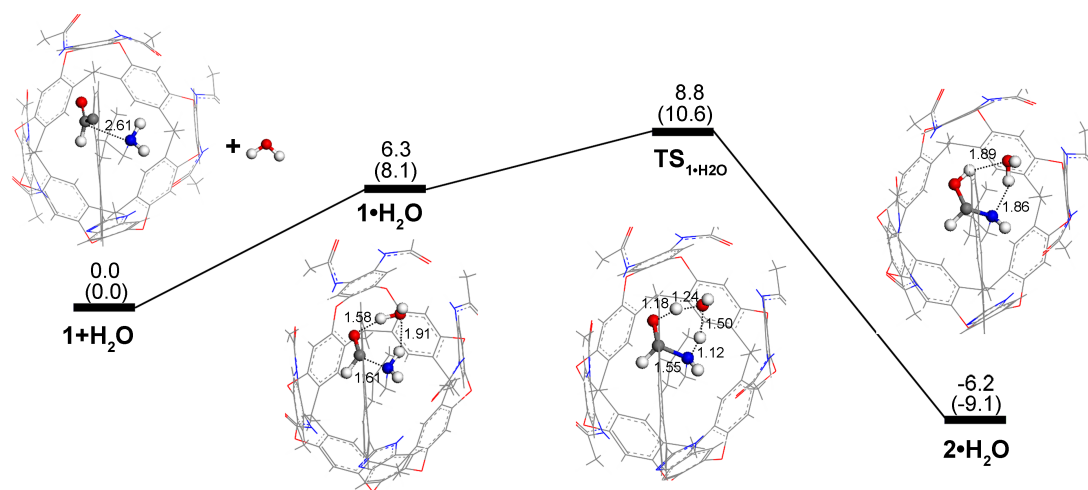

**Figure S2.** Gibbs free energy profile of the hemiaminal formation (the nucleophilic addition) from isobutylamine and the cavitand with a water molecule as the catalyst in the gas phase (298.15K and 1atm). The corresponding free energies in the solvent are also presented in parentheses. Energies are in kcal/mol.

### Cartesian coordinates of optimized geometries of all the species

| <b>1</b> |           |           |          |
|----------|-----------|-----------|----------|
| C        | -3.072442 | -2.777292 | 2.330690 |
| C        | -3.282227 | -2.850837 | 3.830447 |
| H        | -3.139216 | -1.852760 | 4.255093 |
| H        | -4.308723 | -3.165229 | 4.026579 |
| H        | -2.589237 | -3.539771 | 4.316924 |
| C        | 0.656156  | -4.836028 | 2.757052 |
| C        | 1.913935  | -5.094191 | 3.550603 |
| H        | 1.897200  | -6.143433 | 3.851903 |
| H        | 2.825519  | -4.872671 | 2.994556 |
| H        | 1.885780  | -4.487836 | 4.461008 |
| N        | 0.829658  | -4.202101 | 1.562102 |
| H        | 1.799802  | -3.999846 | 1.316718 |
| N        | -1.896113 | -3.326374 | 1.930607 |
| H        | -1.432063 | -3.920332 | 2.627854 |
| O        | -3.895025 | -2.246021 | 1.586787 |
| O        | -0.442636 | -5.181033 | 3.188692 |
| C        | 3.924921  | 2.706971  | 2.017665 |
| C        | 4.547238  | 2.720522  | 3.394792 |
| H        | 5.616570  | 2.521881  | 3.297064 |
| H        | 4.398395  | 3.663934  | 3.921643 |
| H        | 4.108482  | 1.906055  | 3.977470 |
| C        | 1.180312  | 5.797511  | 2.658668 |
| C        | 0.154765  | 6.255196  | 3.670864 |
| H        | -0.843416 | 6.328559  | 3.237065 |
| H        | 0.129096  | 5.547460  | 4.504701 |
| H        | 0.470685  | 7.223182  | 4.058800 |
| N        | 0.677272  | 5.061939  | 1.634277 |
| H        | -0.341162 | 4.948594  | 1.590565 |
| N        | 3.284934  | 3.835697  | 1.661639 |
| H        | 3.238770  | 4.630988  | 2.306860 |
| O        | 3.993047  | 1.704452  | 1.297914 |
| O        | 2.371371  | 6.070759  | 2.797635 |
| C        | -2.940159 | 4.095085  | 2.007998 |
| C        | -2.999732 | 4.516096  | 3.461254 |
| H        | -2.067370 | 4.210485  | 3.943409 |
| H        | -3.074512 | 5.604169  | 3.522689 |
| H        | -3.841195 | 4.067376  | 3.992310 |
| C        | -5.506380 | 0.880004  | 2.684049 |
| C        | -5.684501 | -0.231291 | 3.692729 |
| H        | -5.561128 | -1.216549 | 3.241421 |
| H        | -4.938241 | -0.108941 | 4.484940 |

|   |           |           |           |
|---|-----------|-----------|-----------|
| H | -6.672357 | -0.130729 | 4.142548  |
| N | -4.810001 | 0.526824  | 1.577509  |
| H | -4.472545 | -0.437475 | 1.530211  |
| N | -3.927387 | 3.256183  | 1.643340  |
| H | -4.670891 | 3.029024  | 2.314088  |
| O | -2.048232 | 4.487296  | 1.251052  |
| O | -5.939591 | 2.013767  | 2.899387  |
| C | 3.809621  | -2.192993 | 2.105098  |
| N | 3.782895  | -3.243503 | 1.308553  |
| N | 4.154721  | -1.043200 | 1.460648  |
| C | -1.985541 | 0.537821  | 3.628145  |
| C | -0.950443 | -0.143966 | 3.047273  |
| C | 0.153730  | -0.607329 | 3.845824  |
| C | 0.060635  | -0.465762 | 5.272848  |
| C | -1.059283 | 0.224162  | 5.836191  |
| C | -2.033570 | 0.746509  | 5.035538  |
| C | 1.314177  | -1.161422 | 3.293508  |
| C | 1.070686  | -0.991358 | 6.080691  |
| C | 2.197674  | -1.605662 | 5.533145  |
| C | 2.347026  | -1.641863 | 4.105271  |
| C | 3.554826  | -2.209987 | 3.563951  |
| C | 4.485756  | -2.775949 | 4.390201  |
| C | 4.305770  | -2.782788 | 5.803402  |
| C | 3.206308  | -2.197415 | 6.356770  |
| H | 1.429308  | -1.203074 | 2.215201  |
| H | -2.786438 | 0.886813  | 2.981112  |
| H | -1.106195 | 0.335582  | 6.916057  |
| H | -2.866168 | 1.293018  | 5.469563  |
| H | 0.978919  | -0.918564 | 7.162099  |
| H | 5.376428  | -3.220148 | 3.956885  |
| H | 5.060617  | -3.241390 | 6.433070  |
| H | 3.070369  | -2.176196 | 7.434421  |
| C | -1.066206 | -0.491160 | 1.599791  |
| H | -0.306503 | -1.181109 | 1.202167  |
| O | -2.010903 | -0.148163 | 0.920580  |
| C | -3.130769 | 1.403392  | -5.412148 |
| H | -4.112864 | 1.768746  | -5.106217 |
| C | -3.093576 | 1.377191  | -6.942181 |
| H | -3.263047 | 2.381474  | -7.338058 |
| H | -2.139305 | 1.023016  | -7.341190 |
| C | -2.962474 | 0.027091  | -4.785826 |
| C | -3.681244 | -0.292458 | -3.632139 |
| C | -3.508923 | -1.506677 | -2.983983 |
| H | -4.089126 | -1.755308 | -2.105204 |

|   |           |           |           |
|---|-----------|-----------|-----------|
| C | -2.621071 | -2.437997 | -3.504634 |
| C | -1.922242 | -2.193625 | -4.691761 |
| C | -2.097343 | -0.943639 | -5.291365 |
| H | -1.549291 | -0.726165 | -6.204112 |
| C | -1.057700 | -3.279931 | -5.315016 |
| H | -1.443661 | -4.226745 | -4.929784 |
| C | -1.175099 | -3.315871 | -6.842784 |
| H | -2.223471 | -3.407323 | -7.137688 |
| H | -0.772329 | -2.418334 | -7.320122 |
| C | 0.393432  | -3.203135 | -4.863830 |
| C | 0.841310  | -4.010208 | -3.816270 |
| C | 2.176355  | -4.046335 | -3.456581 |
| H | 2.507401  | -4.746550 | -2.703195 |
| C | 3.076798  | -3.168556 | -4.043138 |
| C | 2.671560  | -2.294723 | -5.054262 |
| C | 1.333445  | -2.360060 | -5.457235 |
| H | 1.000402  | -1.692613 | -6.248526 |
| C | 3.644407  | -1.288947 | -5.654771 |
| H | 4.646621  | -1.635378 | -5.392142 |
| C | 3.552166  | -1.225468 | -7.181728 |
| H | 2.564268  | -0.918801 | -7.535642 |
| H | 4.281103  | -0.511970 | -7.574307 |
| C | 3.474145  | 0.073729  | -4.992938 |
| C | 4.199298  | 0.374389  | -3.836040 |
| C | 4.112736  | 1.620480  | -3.231160 |
| H | 4.761379  | 1.874137  | -2.403334 |
| C | 3.236072  | 2.566647  | -3.741171 |
| C | 2.469555  | 2.312170  | -4.880544 |
| C | 2.617728  | 1.061091  | -5.485881 |
| H | 2.046719  | 0.849656  | -6.385734 |
| C | 1.549549  | 3.398586  | -5.415896 |
| H | 1.967953  | 4.347787  | -5.074531 |
| C | 1.498959  | 3.434331  | -6.946483 |
| H | 2.506528  | 3.555675  | -7.352193 |
| H | 1.074262  | 2.525268  | -7.380360 |
| C | 0.162627  | 3.296938  | -4.795956 |
| C | -0.203652 | 4.086559  | -3.703418 |
| C | -1.489482 | 4.044648  | -3.179484 |
| H | -1.763850 | 4.690043  | -2.353535 |
| C | -2.426743 | 3.176084  | -3.723134 |
| C | -2.106928 | 2.357150  | -4.811725 |
| C | -0.806490 | 2.434090  | -5.307824 |
| H | -0.535754 | 1.795569  | -6.144233 |
| C | -3.939986 | 2.554911  | -2.008714 |



|   |           |           |           |
|---|-----------|-----------|-----------|
| C | -3.789085 | 3.235052  | -0.808284 |
| H | -3.448025 | 4.261996  | -0.804097 |
| C | -4.074376 | 2.601953  | 0.404915  |
| C | -4.559456 | 1.287946  | 0.408236  |
| C | -4.739329 | 0.628298  | -0.803595 |
| H | -5.147042 | -0.375905 | -0.802701 |
| C | -4.420074 | 1.241274  | -2.001771 |
| C | -1.728434 | -3.768829 | -1.768132 |
| C | -2.210765 | -3.413589 | -0.513240 |
| H | -3.212288 | -3.021499 | -0.404994 |
| C | -1.422298 | -3.580140 | 0.630822  |
| C | -0.108820 | -4.077737 | 0.492234  |
| C | 0.342371  | -4.459418 | -0.771408 |
| H | 1.328953  | -4.899989 | -0.864076 |
| C | -0.456319 | -4.329471 | -1.898879 |
| C | 4.459771  | -2.609991 | -2.295570 |
| C | 4.203981  | -3.388494 | -1.181167 |
| H | 4.047338  | -4.456366 | -1.275017 |
| C | 4.126791  | -2.747007 | 0.059865  |
| C | 4.361987  | -1.365527 | 0.141998  |
| C | 4.704387  | -0.582714 | -0.959145 |
| H | 4.893322  | 0.477101  | -0.851191 |
| C | 4.737963  | -1.224788 | -2.183439 |
| C | 2.570570  | 4.018869  | -1.981046 |
| C | 1.304886  | 4.620272  | -1.973096 |
| C | 0.713312  | 4.947788  | -0.762569 |
| H | -0.249688 | 5.446822  | -0.751824 |
| C | 1.358605  | 4.688489  | 0.449591  |
| C | 2.611742  | 4.061312  | 0.439048  |
| C | 3.211620  | 3.745456  | -0.780807 |
| H | 4.204952  | 3.314580  | -0.784708 |
| O | -3.720958 | 3.180146  | -3.220265 |
| O | -4.646812 | 0.600530  | -3.196571 |
| O | -2.527010 | -3.678967 | -2.889382 |
| O | -0.052856 | -4.816168 | -3.127485 |
| O | 4.386340  | -3.152267 | -3.569565 |
| O | 5.088350  | -0.562947 | -3.341608 |
| O | 3.211353  | 3.836533  | -3.184200 |
| O | 0.714737  | 4.981369  | -3.164183 |
| H | -3.875359 | 0.714757  | -7.322286 |
| H | 0.884277  | 4.274514  | -7.278359 |
| H | 3.760874  | -2.209901 | -7.607370 |
| H | -0.622986 | -4.172420 | -7.237262 |
| H | 4.179673  | -0.086332 | 1.814473  |

|   |           |           |           |
|---|-----------|-----------|-----------|
| H | 2.139232  | 0.975764  | -0.886972 |
| C | 1.394282  | 0.369311  | -0.338370 |
| H | 1.915073  | -0.549275 | -0.029620 |
| N | 0.915341  | 1.041153  | 0.872779  |
| C | 0.273350  | -0.013286 | -1.306727 |
| H | -0.351320 | -0.798231 | -0.860412 |
| C | 0.896725  | -0.561318 | -2.584754 |
| H | 0.120548  | -0.908838 | -3.273438 |
| H | 1.464667  | 0.227039  | -3.094207 |
| H | 1.579083  | -1.397885 | -2.381810 |
| C | -0.619925 | 1.176145  | -1.636106 |
| H | -1.329278 | 0.903949  | -2.425918 |
| H | -1.204951 | 1.521671  | -0.776804 |
| H | -0.007929 | 2.007325  | -2.010675 |
| H | 1.727385  | 1.334259  | 1.411079  |
| H | 0.421843  | 1.894715  | 0.616413  |

**TS<sub>1</sub>**

|   |           |           |          |
|---|-----------|-----------|----------|
| C | -1.258488 | -3.212736 | 2.609489 |
| C | -1.257099 | -3.171648 | 4.123783 |
| H | -1.380281 | -2.134960 | 4.445374 |
| H | -2.108372 | -3.750640 | 4.493454 |
| H | -0.338215 | -3.577186 | 4.551801 |
| C | 2.226874  | -5.666674 | 2.580608 |
| C | 3.562505  | -5.926521 | 3.235491 |
| H | 3.646506  | -7.004065 | 3.394849 |
| H | 4.405104  | -5.567623 | 2.643306 |
| H | 3.569426  | -5.442924 | 4.215265 |
| N | 2.281085  | -5.047779 | 1.370577 |
| H | 3.208893  | -4.761671 | 1.054358 |
| N | -0.261812 | -3.969994 | 2.086027 |
| H | 0.226748  | -4.588247 | 2.739398 |
| O | -2.093942 | -2.610377 | 1.937960 |
| O | 1.177312  | -6.001708 | 3.126149 |
| C | 3.877503  | 2.415324  | 1.827807 |
| C | 4.624006  | 2.464772  | 3.138744 |
| H | 5.682296  | 2.273813  | 2.946106 |
| H | 4.516650  | 3.419797  | 3.654356 |
| H | 4.250085  | 1.658044  | 3.774598 |
| C | 1.126924  | 5.412066  | 2.553933 |
| C | 0.161642  | 5.864457  | 3.625137 |
| H | -0.864539 | 5.901962  | 3.256631 |
| H | 0.209196  | 5.172604  | 4.471443 |
| H | 0.477011  | 6.847838  | 3.972115 |

|   |           |           |          |
|---|-----------|-----------|----------|
| N | 0.586798  | 4.593256  | 1.611254 |
| H | -0.431698 | 4.459370  | 1.634268 |
| N | 3.270160  | 3.553498  | 1.453629 |
| H | 3.259790  | 4.370276  | 2.073243 |
| O | 3.826424  | 1.370718  | 1.163107 |
| O | 2.306254  | 5.759363  | 2.575792 |
| C | -2.887215 | 3.545628  | 2.230509 |
| C | -2.892803 | 4.003122  | 3.674693 |
| H | -1.908056 | 3.791541  | 4.101738 |
| H | -3.056453 | 5.081904  | 3.715873 |
| H | -3.652782 | 3.495399  | 4.271437 |
| C | -4.455078 | -0.077240 | 3.319104 |
| C | -4.178011 | -1.103126 | 4.394817 |
| H | -3.813784 | -2.041644 | 3.975206 |
| H | -3.425298 | -0.706961 | 5.083992 |
| H | -5.098299 | -1.267259 | 4.956010 |
| N | -3.832234 | -0.315749 | 2.146584 |
| H | -3.167166 | -1.092474 | 2.109904 |
| N | -3.726376 | 2.526476  | 1.983098 |
| H | -4.322403 | 2.169262  | 2.739647 |
| O | -2.155444 | 4.070821  | 1.385304 |
| O | -5.182503 | 0.895487  | 3.540330 |
| C | 4.606119  | -2.476844 | 1.744910 |
| N | 4.773636  | -3.501801 | 0.931501 |
| N | 4.642549  | -1.275607 | 1.099818 |
| C | -0.878847 | 0.541623  | 3.856500 |
| C | 0.097005  | -0.105902 | 3.152733 |
| C | 1.197313  | -0.722551 | 3.848219 |
| C | 1.206753  | -0.689772 | 5.285527 |
| C | 0.152417  | -0.011658 | 5.976598 |
| C | -0.847237 | 0.602123  | 5.281375 |
| C | 2.256502  | -1.347279 | 3.177927 |
| C | 2.237091  | -1.331173 | 5.974508 |
| C | 3.285847  | -1.966740 | 5.305920 |
| C | 3.319389  | -1.941643 | 3.870164 |
| C | 4.443439  | -2.560240 | 3.209410 |
| C | 5.406373  | -3.205331 | 3.937321 |
| C | 5.340343  | -3.264027 | 5.357704 |
| C | 4.320353  | -2.648709 | 6.020230 |
| H | 2.246259  | -1.388418 | 2.093881 |
| H | -1.694422 | 0.976628  | 3.282716 |
| H | 0.174014  | 0.007340  | 7.062645 |
| H | -1.639005 | 1.125654  | 5.810454 |
| H | 2.224492  | -1.337286 | 7.062166 |

|   |           |           |           |
|---|-----------|-----------|-----------|
| H | 6.237403  | -3.667148 | 3.413056  |
| H | 6.119679  | -3.783302 | 5.904961  |
| H | 4.271490  | -2.666190 | 7.105380  |
| C | -0.088112 | -0.239917 | 1.648421  |
| H | 0.064157  | -1.298837 | 1.364886  |
| O | -1.196861 | 0.355535  | 1.153904  |
| C | -3.298207 | 0.356039  | -5.054340 |
| H | -4.286186 | 0.574370  | -4.643913 |
| C | -3.423947 | 0.288410  | -6.578020 |
| H | -3.810782 | 1.235450  | -6.961720 |
| H | -2.470920 | 0.097566  | -7.078691 |
| C | -2.846369 | -0.958068 | -4.427408 |
| C | -3.324731 | -1.311454 | -3.162142 |
| C | -2.894786 | -2.464856 | -2.520024 |
| H | -3.311710 | -2.753435 | -1.564071 |
| C | -1.985956 | -3.299871 | -3.155090 |
| C | -1.524414 | -3.027278 | -4.447801 |
| C | -1.952635 | -1.837040 | -5.042863 |
| H | -1.600683 | -1.602525 | -6.043524 |
| C | -0.653946 | -4.048246 | -5.169655 |
| H | -0.912930 | -5.018702 | -4.739618 |
| C | -0.940087 | -4.111305 | -6.673714 |
| H | -2.005689 | -4.279003 | -6.849500 |
| H | -0.655269 | -3.194884 | -7.197779 |
| C | 0.826601  | -3.841735 | -4.888826 |
| C | 1.489930  | -4.617100 | -3.936297 |
| C | 2.845598  | -4.460741 | -3.703271 |
| H | 3.344156  | -5.106897 | -2.994435 |
| C | 3.551351  | -3.446281 | -4.334208 |
| C | 2.928202  | -2.617145 | -5.270232 |
| C | 1.577059  | -2.858823 | -5.535842 |
| H | 1.070040  | -2.213765 | -6.249772 |
| C | 3.677496  | -1.472285 | -5.937846 |
| H | 4.741287  | -1.667689 | -5.782198 |
| C | 3.425942  | -1.416175 | -7.447393 |
| H | 2.372069  | -1.265972 | -7.696789 |
| H | 3.993802  | -0.596497 | -7.895191 |
| C | 3.378168  | -0.151292 | -5.238447 |
| C | 4.157080  | 0.234916  | -4.143489 |
| C | 3.977733  | 1.461732  | -3.521236 |
| H | 4.669931  | 1.793797  | -2.758673 |
| C | 2.959997  | 2.300681  | -3.950456 |
| C | 2.137316  | 1.958182  | -5.026190 |
| C | 2.373601  | 0.728075  | -5.647210 |

|   |           |           |           |
|---|-----------|-----------|-----------|
| H | 1.763266  | 0.457223  | -6.503972 |
| C | 1.070342  | 2.936015  | -5.497769 |
| H | 1.408087  | 3.928405  | -5.190967 |
| C | 0.909192  | 2.950364  | -7.020882 |
| H | 1.869953  | 3.159611  | -7.498249 |
| H | 0.539585  | 2.002253  | -7.420155 |
| C | -0.248200 | 2.689974  | -4.778991 |
| C | -0.599096 | 3.426555  | -3.644682 |
| C | -1.818049 | 3.237524  | -3.010733 |
| H | -2.088547 | 3.841886  | -2.152883 |
| C | -2.695916 | 2.267887  | -3.479067 |
| C | -2.375437 | 1.475000  | -4.585766 |
| C | -1.149098 | 1.715342  | -5.206576 |
| H | -0.876205 | 1.101983  | -6.061293 |
| C | -3.916756 | 1.571380  | -1.600855 |
| C | -3.815421 | 2.361617  | -0.463953 |
| H | -3.730468 | 3.437404  | -0.553439 |
| C | -3.823918 | 1.771453  | 0.799099  |
| C | -3.953477 | 0.384596  | 0.921954  |
| C | -4.108186 | -0.391473 | -0.221486 |
| H | -4.256346 | -1.459429 | -0.114615 |
| C | -4.085062 | 0.189871  | -1.477589 |
| C | -0.693571 | -4.543867 | -1.576694 |
| C | -0.972295 | -4.145640 | -0.273236 |
| H | -1.934363 | -3.717453 | -0.028690 |
| C | -0.020328 | -4.305492 | 0.742088  |
| C | 1.224460  | -4.885716 | 0.430019  |
| C | 1.477699  | -5.296351 | -0.878447 |
| H | 2.418420  | -5.787033 | -1.102828 |
| C | 0.538945  | -5.124386 | -1.885893 |
| C | 4.989766  | -2.721635 | -2.699936 |
| C | 4.988806  | -3.544883 | -1.588069 |
| H | 5.023830  | -4.622524 | -1.698074 |
| C | 4.897167  | -2.939689 | -0.328574 |
| C | 4.824933  | -1.539863 | -0.235021 |
| C | 4.928253  | -0.696121 | -1.339241 |
| H | 4.912363  | 0.379746  | -1.224179 |
| C | 5.018311  | -1.310601 | -2.575234 |
| C | 2.281706  | 3.665650  | -2.129070 |
| C | 0.963419  | 4.132333  | -2.026056 |
| C | 0.432466  | 4.416331  | -0.778125 |
| H | -0.570085 | 4.821795  | -0.695246 |
| C | 1.191214  | 4.237270  | 0.382997  |
| C | 2.489095  | 3.722502  | 0.281614  |

|          |           |           |           |
|----------|-----------|-----------|-----------|
| C        | 3.030037  | 3.459302  | -0.978874 |
| H        | 4.060053  | 3.130575  | -1.051722 |
| O        | -3.931243 | 2.133764  | -2.863400 |
| O        | -4.335265 | -0.546354 | -2.613483 |
| O        | -1.655375 | -4.508416 | -2.561896 |
| O        | 0.792451  | -5.550932 | -3.177064 |
| O        | 4.885438  | -3.252965 | -3.976925 |
| O        | 5.187363  | -0.591892 | -3.738546 |
| O        | 2.842483  | 3.557626  | -3.379891 |
| O        | 0.260614  | 4.414832  | -3.175016 |
| H        | -4.112444 | -0.511429 | -6.862433 |
| H        | 0.197101  | 3.726653  | -7.310809 |
| H        | 3.741423  | -2.354276 | -7.910138 |
| H        | -0.376924 | -4.932591 | -7.123358 |
| H        | 4.467673  | -0.341983 | 1.478773  |
| H        | 2.220245  | 0.611170  | -0.796387 |
| C        | 1.571549  | -0.111795 | -0.285537 |
| H        | 2.220562  | -0.905867 | 0.104695  |
| N        | 0.937112  | 0.587725  | 0.849857  |
| C        | 0.565020  | -0.700440 | -1.268618 |
| H        | -0.147065 | -1.340740 | -0.728988 |
| C        | 1.337374  | -1.561422 | -2.261955 |
| H        | 0.648717  | -2.023437 | -2.973885 |
| H        | 2.044583  | -0.947470 | -2.835094 |
| H        | 1.902607  | -2.358956 | -1.761107 |
| C        | -0.223832 | 0.388785  | -1.985579 |
| H        | -0.826279 | -0.050717 | -2.786681 |
| H        | -0.902536 | 0.911456  | -1.304203 |
| H        | 0.461008  | 1.114248  | -2.445442 |
| H        | 1.640300  | 1.092021  | 1.392249  |
| H        | -0.127028 | 1.078792  | 0.634422  |
| <b>2</b> |           |           |           |
| C        | -2.381814 | -2.492298 | 2.227062  |
| C        | -2.546725 | -2.385908 | 3.728724  |
| H        | -2.589037 | -1.328327 | 3.999869  |
| H        | -3.491556 | -2.855751 | 4.016906  |
| H        | -1.731802 | -2.866368 | 4.273552  |
| C        | 0.783938  | -5.324982 | 2.637823  |
| C        | 2.002184  | -5.709529 | 3.443214  |
| H        | 1.960588  | -6.789117 | 3.606248  |
| H        | 2.938582  | -5.439891 | 2.953352  |
| H        | 1.942874  | -5.222445 | 4.419407  |
| N        | 1.039747  | -4.746967 | 1.434321  |

|   |           |           |          |
|---|-----------|-----------|----------|
| H | 2.021545  | -4.552713 | 1.228290 |
| N | -1.442895 | -3.389659 | 1.843310 |
| H | -1.103398 | -4.034239 | 2.562583 |
| O | -3.050273 | -1.812556 | 1.447595 |
| O | -0.350772 | -5.533746 | 3.063908 |
| C | 3.670101  | 2.481225  | 2.086194 |
| C | 4.262748  | 2.457060  | 3.475203 |
| H | 5.315749  | 2.174514  | 3.405987 |
| H | 4.177116  | 3.414867  | 3.990262 |
| H | 3.746336  | 1.683901  | 4.049904 |
| C | 1.029199  | 5.356185  | 2.753970 |
| C | 0.011858  | 5.549624  | 3.856839 |
| H | -0.923977 | 5.941599  | 3.453153 |
| H | -0.199250 | 4.587825  | 4.335205 |
| H | 0.421356  | 6.240249  | 4.591528 |
| N | 0.562860  | 4.647162  | 1.692210 |
| H | -0.439287 | 4.440189  | 1.677941 |
| N | 3.246663  | 3.679396  | 1.650198 |
| H | 3.227857  | 4.479055  | 2.287287 |
| O | 3.581881  | 1.449769  | 1.410884 |
| O | 2.172755  | 5.794389  | 2.853779 |
| C | -3.222055 | 3.997069  | 1.941815 |
| C | -3.408924 | 4.631797  | 3.301033 |
| H | -2.627559 | 4.257755  | 3.966833 |
| H | -3.288673 | 5.714285  | 3.213153 |
| H | -4.387544 | 4.413241  | 3.731226 |
| C | -5.457123 | 0.856425  | 2.680524 |
| C | -5.370276 | -0.108700 | 3.842102 |
| H | -5.198010 | -1.132129 | 3.503600 |
| H | -4.535967 | 0.183911  | 4.488806 |
| H | -6.294421 | -0.048214 | 4.415281 |
| N | -4.689037 | 0.517174  | 1.618908 |
| H | -4.117335 | -0.332140 | 1.679222 |
| N | -4.296264 | 3.337804  | 1.479560 |
| H | -5.099208 | 3.170766  | 2.092229 |
| O | -2.158522 | 4.075889  | 1.316769 |
| O | -6.154341 | 1.869958  | 2.739197 |
| C | 3.604609  | -2.414687 | 2.106707 |
| N | 3.709372  | -3.462426 | 1.309854 |
| N | 3.879384  | -1.240144 | 1.476317 |
| C | -1.684512 | 1.250776  | 3.646106 |
| C | -0.687169 | 0.540261  | 3.038270 |
| C | 0.259176  | -0.191622 | 3.848582 |
| C | 0.105127  | -0.171595 | 5.277646 |

|   |           |           |           |
|---|-----------|-----------|-----------|
| C | -0.946386 | 0.604544  | 5.860350  |
| C | -1.807127 | 1.302167  | 5.067224  |
| C | 1.301789  | -0.947487 | 3.294960  |
| C | 0.967193  | -0.932703 | 6.069062  |
| C | 1.994912  | -1.698169 | 5.515021  |
| C | 2.188367  | -1.682358 | 4.092265  |
| C | 3.279387  | -2.456375 | 3.547282  |
| C | 4.061708  | -3.220529 | 4.370080  |
| C | 3.838728  | -3.258306 | 5.775402  |
| C | 2.845711  | -2.508079 | 6.331097  |
| H | 1.421389  | -0.977533 | 2.218858  |
| H | -2.427779 | 1.732256  | 3.017458  |
| H | -1.044665 | 0.616725  | 6.942122  |
| H | -2.609794 | 1.884967  | 5.511403  |
| H | 0.828434  | -0.937777 | 7.147898  |
| H | 4.872013  | -3.796589 | 3.933654  |
| H | 4.477950  | -3.874374 | 6.398736  |
| H | 2.678569  | -2.513190 | 7.404514  |
| C | -0.658469 | 0.413687  | 1.520512  |
| H | -0.725123 | -0.663754 | 1.295433  |
| O | -1.809040 | 0.979243  | 0.938044  |
| C | -3.182958 | 1.138352  | -5.481303 |
| H | -4.182763 | 1.455562  | -5.177505 |
| C | -3.149340 | 1.090814  | -7.010397 |
| H | -3.384607 | 2.076804  | -7.418348 |
| H | -2.175125 | 0.795004  | -7.408863 |
| C | -2.938283 | -0.218677 | -4.829821 |
| C | -3.588707 | -0.530674 | -3.633301 |
| C | -3.367118 | -1.731439 | -2.975109 |
| H | -3.921857 | -1.981360 | -2.080613 |
| C | -2.492101 | -2.656747 | -3.525211 |
| C | -1.860248 | -2.423192 | -4.750934 |
| C | -2.084208 | -1.186752 | -5.362632 |
| H | -1.597768 | -0.983260 | -6.312389 |
| C | -1.016842 | -3.520867 | -5.385003 |
| H | -1.417157 | -4.465782 | -5.009650 |
| C | -1.123717 | -3.542156 | -6.913316 |
| H | -2.171493 | -3.604990 | -7.218261 |
| H | -0.692587 | -2.652301 | -7.380191 |
| C | 0.430534  | -3.457871 | -4.922421 |
| C | 0.899884  | -4.298805 | -3.911800 |
| C | 2.229063  | -4.279210 | -3.524272 |
| H | 2.579242  | -4.979579 | -2.779366 |
| C | 3.098735  | -3.339418 | -4.057314 |



|   |           |           |           |
|---|-----------|-----------|-----------|
| C | 2.671759  | -2.450348 | -5.046917 |
| C | 1.342904  | -2.552109 | -5.465128 |
| H | 0.987795  | -1.858253 | -6.223483 |
| C | 3.607162  | -1.395426 | -5.617722 |
| H | 4.619637  | -1.703195 | -5.345989 |
| C | 3.533004  | -1.320092 | -7.145592 |
| H | 2.539029  | -1.046710 | -7.509810 |
| H | 4.240634  | -0.576822 | -7.521741 |
| C | 3.380603  | -0.044882 | -4.948892 |
| C | 4.091866  | 0.268364  | -3.786128 |
| C | 4.001845  | 1.521314  | -3.198171 |
| H | 4.643511  | 1.781288  | -2.366779 |
| C | 3.136969  | 2.464881  | -3.734255 |
| C | 2.369087  | 2.190972  | -4.867249 |
| C | 2.517654  | 0.930035  | -5.452916 |
| H | 1.952008  | 0.707085  | -6.353427 |
| C | 1.443439  | 3.264069  | -5.421225 |
| H | 1.836325  | 4.218935  | -5.065861 |
| C | 1.432129  | 3.303671  | -6.952434 |
| H | 2.447015  | 3.450862  | -7.330267 |
| H | 1.042678  | 2.385364  | -7.399953 |
| C | 0.044848  | 3.133537  | -4.834218 |
| C | -0.338900 | 3.874674  | -3.711743 |
| C | -1.635382 | 3.813220  | -3.220054 |
| H | -1.928992 | 4.431391  | -2.379720 |
| C | -2.557527 | 2.956645  | -3.808644 |
| C | -2.207033 | 2.151988  | -4.896602 |
| C | -0.904521 | 2.272847  | -5.382683 |
| H | -0.611824 | 1.655862  | -6.227837 |
| C | -4.068599 | 2.383449  | -2.095578 |
| C | -4.058334 | 3.155723  | -0.943959 |
| H | -3.866343 | 4.220687  | -1.005297 |
| C | -4.307854 | 2.566824  | 0.294366  |
| C | -4.575945 | 1.199564  | 0.386632  |
| C | -4.638296 | 0.440438  | -0.780013 |
| H | -4.899093 | -0.608935 | -0.713612 |
| C | -4.388597 | 1.023319  | -2.011476 |
| C | -1.526061 | -4.019077 | -1.830824 |
| C | -1.906463 | -3.570123 | -0.571452 |
| H | -2.842861 | -3.047345 | -0.437562 |
| C | -1.089162 | -3.792398 | 0.542336  |
| C | 0.116149  | -4.501082 | 0.380045  |
| C | 0.470770  | -4.961303 | -0.888076 |
| H | 1.382853  | -5.536677 | -1.003353 |

|   |           |           |           |
|---|-----------|-----------|-----------|
| C | -0.327409 | -4.716288 | -1.996244 |
| C | 4.419166  | -2.750051 | -2.273336 |
| C | 4.190741  | -3.555893 | -1.172469 |
| H | 4.097820  | -4.629830 | -1.284094 |
| C | 4.043958  | -2.933822 | 0.073242  |
| C | 4.157159  | -1.536933 | 0.166475  |
| C | 4.482624  | -0.722357 | -0.916933 |
| H | 4.591126  | 0.348166  | -0.796803 |
| C | 4.611737  | -1.351987 | -2.141276 |
| C | 2.476993  | 3.891022  | -1.975985 |
| C | 1.168695  | 4.392554  | -1.943695 |
| C | 0.562164  | 4.641666  | -0.720324 |
| H | -0.439071 | 5.057550  | -0.685720 |
| C | 1.240792  | 4.396993  | 0.477726  |
| C | 2.543696  | 3.891944  | 0.437766  |
| C | 3.156464  | 3.655231  | -0.789994 |
| H | 4.185246  | 3.315760  | -0.812112 |
| O | -3.864685 | 2.947802  | -3.336369 |
| O | -4.570930 | 0.331679  | -3.182806 |
| O | -2.358731 | -3.896010 | -2.921361 |
| O | 0.034556  | -5.167188 | -3.252944 |
| O | 4.397122  | -3.281460 | -3.554951 |
| O | 4.977960  | -0.663707 | -3.279020 |
| O | 3.107215  | 3.740720  | -3.190296 |
| O | 0.563982  | 4.755552  | -3.128607 |
| H | -3.887611 | 0.374324  | -7.379397 |
| H | 0.806016  | 4.129390  | -7.299174 |
| H | 3.783485  | -2.292299 | -7.576838 |
| H | -0.590183 | -4.409515 | -7.309330 |
| H | 3.817548  | -0.283732 | 1.834638  |
| H | 1.998974  | 0.652707  | -0.515763 |
| C | 1.119149  | 0.127455  | -0.121472 |
| H | 1.479833  | -0.836816 | 0.288328  |
| N | 0.528109  | 0.973281  | 0.914359  |
| C | 0.163394  | -0.198201 | -1.267683 |
| H | -0.749841 | -0.656820 | -0.858416 |
| C | 0.837180  | -1.206782 | -2.192539 |
| H | 0.168409  | -1.493080 | -3.010673 |
| H | 1.739365  | -0.768142 | -2.639761 |
| H | 1.135745  | -2.116473 | -1.654249 |
| C | -0.231415 | 1.057680  | -2.026377 |
| H | -0.927189 | 0.821043  | -2.839260 |
| H | -0.702960 | 1.791262  | -1.366374 |
| H | 0.661954  | 1.519079  | -2.469041 |

|          |           |           |          |
|----------|-----------|-----------|----------|
| H        | 1.234683  | 1.254351  | 1.585462 |
| H        | -1.598243 | 1.910556  | 0.755849 |
| <b>3</b> |           |           |          |
| C        | -2.337483 | -2.352761 | 2.244255 |
| C        | -2.497412 | -2.253966 | 3.747119 |
| H        | -2.521645 | -1.198237 | 4.027116 |
| H        | -3.449352 | -2.710692 | 4.033557 |
| H        | -1.690099 | -2.753455 | 4.286261 |
| C        | 0.756616  | -5.271105 | 2.617562 |
| C        | 1.973587  | -5.680501 | 3.412351 |
| H        | 1.911199  | -6.758968 | 3.576108 |
| H        | 2.911059  | -5.430653 | 2.914142 |
| H        | 1.933215  | -5.192180 | 4.388912 |
| N        | 1.014244  | -4.695530 | 1.413244 |
| H        | 1.998041  | -4.519001 | 1.198098 |
| N        | -1.438656 | -3.288700 | 1.852823 |
| H        | -1.116838 | -3.947013 | 2.568087 |
| O        | -2.976052 | -1.636222 | 1.472470 |
| O        | -0.378390 | -5.459736 | 3.051942 |
| C        | 3.528085  | 2.361295  | 2.045564 |
| C        | 3.940053  | 2.260356  | 3.495965 |
| H        | 5.014391  | 2.073017  | 3.547227 |
| H        | 3.692557  | 3.153283  | 4.071399 |
| H        | 3.426783  | 1.397968  | 3.934506 |
| C        | 0.465225  | 4.997751  | 2.766452 |
| C        | -0.704306 | 5.184645  | 3.701014 |
| H        | -1.400348 | 5.901999  | 3.260323 |
| H        | -1.232503 | 4.236876  | 3.842220 |
| H        | -0.332295 | 5.552488  | 4.655205 |
| N        | 0.149340  | 4.396844  | 1.587356 |
| H        | -0.845911 | 4.272719  | 1.405368 |
| N        | 2.850272  | 3.473752  | 1.714321 |
| H        | 2.647760  | 4.182490  | 2.429657 |
| O        | 3.770890  | 1.449282  | 1.247613 |
| O        | 1.597448  | 5.369142  | 3.071736 |
| C        | -3.622628 | 4.712065  | 1.767933 |
| C        | -4.074080 | 5.458910  | 3.007874 |
| H        | -3.609284 | 5.015354  | 3.893557 |
| H        | -3.751102 | 6.496849  | 2.929557 |
| H        | -5.157203 | 5.416389  | 3.134964 |
| C        | -5.382346 | 1.071011  | 2.729940 |
| C        | -5.271135 | 0.112898  | 3.895448 |
| H        | -5.099302 | -0.909855 | 3.553708 |

|   |           |           |           |
|---|-----------|-----------|-----------|
| H | -4.425879 | 0.407900  | 4.526623  |
| H | -6.186480 | 0.169071  | 4.482533  |
| N | -4.557714 | 0.782522  | 1.696204  |
| H | -3.959950 | -0.046847 | 1.761014  |
| N | -4.387812 | 3.639272  | 1.468257  |
| H | -5.161326 | 3.377122  | 2.086033  |
| O | -2.632932 | 5.055500  | 1.121741  |
| O | -6.143675 | 2.037442  | 2.758600  |
| C | 3.632598  | -2.416254 | 2.040710  |
| N | 3.693473  | -3.458429 | 1.232130  |
| N | 3.938011  | -1.245689 | 1.418028  |
| C | -1.548563 | 1.381392  | 3.639393  |
| C | -0.596231 | 0.619800  | 3.018484  |
| C | 0.340934  | -0.139969 | 3.813389  |
| C | 0.210069  | -0.109894 | 5.244895  |
| C | -0.805743 | 0.701030  | 5.842375  |
| C | -1.646713 | 1.435417  | 5.062309  |
| C | 1.360954  | -0.918770 | 3.248451  |
| C | 1.063915  | -0.889631 | 6.027025  |
| C | 2.068198  | -1.677640 | 5.462614  |
| C | 2.244772  | -1.667076 | 4.037653  |
| C | 3.319127  | -2.457686 | 3.483543  |
| C | 4.097596  | -3.233927 | 4.298387  |
| C | 3.888095  | -3.268490 | 5.705838  |
| C | 2.913559  | -2.501281 | 6.270720  |
| H | 1.468685  | -0.951278 | 2.171297  |
| H | -2.263036 | 1.920640  | 3.023670  |
| H | -0.886389 | 0.717324  | 6.925503  |
| H | -2.412575 | 2.057485  | 5.517507  |
| H | 0.940133  | -0.886637 | 7.107640  |
| H | 4.895217  | -3.821584 | 3.854120  |
| H | 4.523828  | -3.894066 | 6.323175  |
| H | 2.757828  | -2.501796 | 7.345843  |
| C | -0.596691 | 0.485491  | 1.508100  |
| H | -0.681847 | -0.592283 | 1.282406  |
| O | -1.758263 | 1.138339  | 1.035775  |
| C | -3.235274 | 1.250810  | -5.456948 |
| H | -4.231438 | 1.568356  | -5.141026 |
| C | -3.221752 | 1.194555  | -6.986015 |
| H | -3.472714 | 2.175953  | -7.395441 |
| H | -2.249302 | 0.907677  | -7.395403 |
| C | -2.979601 | -0.100617 | -4.799544 |
| C | -3.590616 | -0.389196 | -3.575974 |
| C | -3.375876 | -1.592237 | -2.920075 |

|   |           |           |           |
|---|-----------|-----------|-----------|
| H | -3.914212 | -1.827850 | -2.011666 |
| C | -2.542333 | -2.540168 | -3.496267 |
| C | -1.940401 | -2.323435 | -4.739816 |
| C | -2.161889 | -1.087260 | -5.353318 |
| H | -1.706141 | -0.900524 | -6.321430 |
| C | -1.124207 | -3.434158 | -5.386147 |
| H | -1.529420 | -4.373393 | -5.001954 |
| C | -1.254147 | -3.457601 | -6.912447 |
| H | -2.307104 | -3.504634 | -7.202096 |
| H | -0.815170 | -2.576307 | -7.388191 |
| C | 0.330929  | -3.385237 | -4.945118 |
| C | 0.806606  | -4.230498 | -3.941015 |
| C | 2.142444  | -4.225718 | -3.576495 |
| H | 2.497046  | -4.933433 | -2.840803 |
| C | 3.011767  | -3.290839 | -4.118867 |
| C | 2.577310  | -2.390504 | -5.095369 |
| C | 1.242543  | -2.483288 | -5.497297 |
| H | 0.880879  | -1.783627 | -6.247308 |
| C | 3.514768  | -1.335677 | -5.666076 |
| H | 4.527886  | -1.657233 | -5.413808 |
| C | 3.418465  | -1.239880 | -7.191525 |
| H | 2.421279  | -0.954892 | -7.537496 |
| H | 4.125880  | -0.496982 | -7.568707 |
| C | 3.312945  | 0.009415  | -4.976457 |
| C | 4.042885  | 0.305539  | -3.820417 |
| C | 3.955722  | 1.548159  | -3.207256 |
| H | 4.603893  | 1.796517  | -2.376962 |
| C | 3.087419  | 2.504984  | -3.716743 |
| C | 2.320424  | 2.253973  | -4.857829 |
| C | 2.455286  | 0.998953  | -5.459462 |
| H | 1.884345  | 0.794629  | -6.360926 |
| C | 1.414689  | 3.340256  | -5.418768 |
| H | 1.818574  | 4.288322  | -5.057490 |
| C | 1.417694  | 3.382375  | -6.950232 |
| H | 2.439531  | 3.494103  | -7.321376 |
| H | 0.997113  | 2.479731  | -7.401540 |
| C | 0.006534  | 3.233614  | -4.851367 |
| C | -0.377069 | 4.009494  | -3.754391 |
| C | -1.673854 | 3.973481  | -3.263577 |
| H | -1.969528 | 4.619917  | -2.445984 |
| C | -2.599402 | 3.104492  | -3.826272 |
| C | -2.253676 | 2.270734  | -4.893872 |
| C | -0.949041 | 2.369130  | -5.382792 |
| H | -0.658887 | 1.726101  | -6.209756 |

|   |           |           |           |
|---|-----------|-----------|-----------|
| C | -4.062535 | 2.576635  | -2.071028 |
| C | -4.067278 | 3.383535  | -0.942870 |
| H | -3.922144 | 4.452644  | -1.042985 |
| C | -4.281665 | 2.827044  | 0.321580  |
| C | -4.478179 | 1.447481  | 0.449782  |
| C | -4.519750 | 0.651378  | -0.695333 |
| H | -4.732887 | -0.405544 | -0.587705 |
| C | -4.328257 | 1.207719  | -1.949726 |
| C | -1.577308 | -3.918742 | -1.818163 |
| C | -1.933369 | -3.463792 | -0.553985 |
| H | -2.861618 | -2.930220 | -0.406188 |
| C | -1.104741 | -3.698186 | 0.548664  |
| C | 0.085228  | -4.428711 | 0.369782  |
| C | 0.416439  | -4.893152 | -0.903990 |
| H | 1.317601  | -5.483292 | -1.031625 |
| C | -0.391752 | -4.633597 | -2.001808 |
| C | 4.371352  | -2.728331 | -2.354006 |
| C | 4.141867  | -3.540223 | -1.257369 |
| H | 4.022957  | -4.610508 | -1.377275 |
| C | 4.029581  | -2.928010 | -0.003554 |
| C | 4.189072  | -1.536988 | 0.102399  |
| C | 4.517897  | -0.719604 | -0.976930 |
| H | 4.662810  | 0.344660  | -0.846240 |
| C | 4.597687  | -1.336581 | -2.211097 |
| C | 2.367521  | 3.902293  | -1.951890 |
| C | 1.083720  | 4.458195  | -1.974595 |
| C | 0.395852  | 4.646253  | -0.784519 |
| H | -0.595746 | 5.086958  | -0.789346 |
| C | 0.963520  | 4.280785  | 0.435321  |
| C | 2.264558  | 3.762121  | 0.460907  |
| C | 2.958997  | 3.584440  | -0.735190 |
| H | 3.972274  | 3.203381  | -0.708385 |
| O | -3.898740 | 3.110743  | -3.332518 |
| O | -4.539506 | 0.494333  | -3.102862 |
| O | -2.422232 | -3.782094 | -2.896807 |
| O | -0.056408 | -5.088545 | -3.264828 |
| O | 4.318513  | -3.246365 | -3.639947 |
| O | 4.940341  | -0.634680 | -3.347799 |
| O | 3.062885  | 3.766654  | -3.136158 |
| O | 0.544787  | 4.870988  | -3.175133 |
| H | -3.957417 | 0.468751  | -7.341984 |
| H | 0.823536  | 4.230550  | -7.298921 |
| H | 3.655210  | -2.208191 | -7.638915 |
| H | -0.740488 | -4.334464 | -7.313555 |

|   |           |           |           |
|---|-----------|-----------|-----------|
| H | 3.924041  | -0.289976 | 1.778899  |
| H | 2.055458  | 0.627320  | -0.553502 |
| C | 1.159557  | 0.129272  | -0.160776 |
| H | 1.487182  | -0.850285 | 0.241112  |
| N | 0.583478  | 0.994409  | 0.857919  |
| C | 0.187930  | -0.150517 | -1.309036 |
| H | -0.734308 | -0.593638 | -0.894641 |
| C | 0.807262  | -1.176129 | -2.249955 |
| H | 0.117091  | -1.426259 | -3.061530 |
| H | 1.720989  | -0.769949 | -2.703016 |
| H | 1.074123  | -2.100882 | -1.722325 |
| C | -0.166924 | 1.127913  | -2.059631 |
| H | -0.927753 | 0.941163  | -2.825929 |
| H | -0.522052 | 1.921011  | -1.390409 |
| H | 0.727571  | 1.518819  | -2.562030 |
| H | 1.271876  | 1.387673  | 1.485665  |
| H | -1.669877 | 1.218430  | 0.077645  |

#### 4

|   |           |           |          |
|---|-----------|-----------|----------|
| C | -2.200296 | -2.435917 | 2.243473 |
| C | -2.377138 | -2.328332 | 3.742925 |
| H | -2.389496 | -1.271337 | 4.019187 |
| H | -3.338523 | -2.770941 | 4.020202 |
| H | -1.583136 | -2.837903 | 4.292292 |
| C | 0.848465  | -5.381479 | 2.625340 |
| C | 2.062000  | -5.775115 | 3.432791 |
| H | 2.017445  | -6.855728 | 3.587924 |
| H | 3.000441  | -5.505114 | 2.947077 |
| H | 2.001494  | -5.294452 | 4.411949 |
| N | 1.111210  | -4.800435 | 1.425640 |
| H | 2.092094  | -4.586085 | 1.227183 |
| N | -1.344991 | -3.408990 | 1.860283 |
| H | -1.038748 | -4.074378 | 2.576655 |
| O | -2.797562 | -1.690144 | 1.461084 |
| O | -0.289183 | -5.588672 | 3.045218 |
| C | 3.661798  | 2.393733  | 2.081092 |
| C | 4.125172  | 2.334460  | 3.517437 |
| H | 5.202069  | 2.155450  | 3.535283 |
| H | 3.893149  | 3.241723  | 4.076655 |
| H | 3.635202  | 1.480873  | 3.995993 |
| C | 0.484418  | 4.692404  | 2.816695 |
| C | -0.600723 | 4.581058  | 3.860616 |
| H | -0.763254 | 5.570890  | 4.290367 |
| H | -1.533755 | 4.184792  | 3.459413 |

|   |           |           |          |
|---|-----------|-----------|----------|
| H | -0.250977 | 3.917663  | 4.656440 |
| N | 0.232597  | 4.060627  | 1.644518 |
| H | -0.691781 | 3.657891  | 1.500503 |
| N | 3.014959  | 3.515551  | 1.722155 |
| H | 2.794723  | 4.228870  | 2.424725 |
| O | 3.844800  | 1.446131  | 1.308941 |
| O | 1.531851  | 5.291069  | 3.062403 |
| C | -3.398484 | 4.651594  | 1.610189 |
| C | -3.783229 | 5.518778  | 2.792019 |
| H | -4.026275 | 4.918442  | 3.673023 |
| H | -2.963273 | 6.200167  | 3.012946 |
| H | -4.669086 | 6.104038  | 2.529227 |
| C | -5.209315 | 1.006277  | 2.796901 |
| C | -5.114828 | 0.044130  | 3.960801 |
| H | -4.993700 | -0.985769 | 3.618743 |
| H | -4.247948 | 0.303049  | 4.577787 |
| H | -6.017451 | 0.138765  | 4.562596 |
| N | -4.426533 | 0.679016  | 1.738761 |
| H | -3.871897 | -0.179627 | 1.793027 |
| N | -4.176569 | 3.545162  | 1.462634 |
| H | -4.903201 | 3.330481  | 2.148314 |
| O | -2.480692 | 4.947677  | 0.854199 |
| O | -5.925909 | 2.003760  | 2.842709 |
| C | 3.642369  | -2.412392 | 2.069564 |
| N | 3.717432  | -3.454783 | 1.262169 |
| N | 3.957429  | -1.242216 | 1.452267 |
| C | -1.567337 | 1.374759  | 3.728930 |
| C | -0.579502 | 0.684225  | 3.076616 |
| C | 0.341878  | -0.125464 | 3.850496 |
| C | 0.177126  | -0.166891 | 5.281550 |
| C | -0.857531 | 0.597907  | 5.905015 |
| C | -1.699863 | 1.351897  | 5.148705 |
| C | 1.369885  | -0.895687 | 3.284639 |
| C | 1.014055  | -0.974620 | 6.052089 |
| C | 2.031524  | -1.740359 | 5.484363 |
| C | 2.231217  | -1.682041 | 4.064565 |
| C | 3.309187  | -2.466244 | 3.506941 |
| C | 4.075517  | -3.263334 | 4.313863 |
| C | 3.848605  | -3.334052 | 5.716811 |
| C | 2.862524  | -2.585075 | 6.285113 |
| H | 1.502555  | -0.895217 | 2.212201 |
| H | -2.282844 | 1.937633  | 3.138287 |
| H | -0.953182 | 0.556728  | 6.986297 |
| H | -2.486960 | 1.937416  | 5.615911 |



|   |           |           |           |
|---|-----------|-----------|-----------|
| H | 0.862720  | -1.012527 | 7.128525  |
| H | 4.877003  | -3.841853 | 3.864648  |
| H | 4.476835  | -3.974270 | 6.326794  |
| H | 2.687014  | -2.614665 | 7.356777  |
| C | -0.571871 | 0.682556  | 1.551240  |
| H | -0.914077 | -0.312538 | 1.234120  |
| O | -1.559645 | 1.636511  | 1.151612  |
| C | -3.209598 | 1.110788  | -5.431743 |
| H | -4.208044 | 1.419792  | -5.114673 |
| C | -3.199487 | 1.047545  | -6.960630 |
| H | -3.465881 | 2.023683  | -7.372883 |
| H | -2.223889 | 0.773855  | -7.371602 |
| C | -2.939766 | -0.235101 | -4.768387 |
| C | -3.550204 | -0.538416 | -3.547453 |
| C | -3.320424 | -1.743332 | -2.898984 |
| H | -3.860872 | -1.989451 | -1.994240 |
| C | -2.471775 | -2.676417 | -3.477232 |
| C | -1.868413 | -2.443548 | -4.716855 |
| C | -2.105634 | -1.207580 | -5.323212 |
| H | -1.648871 | -1.008894 | -6.288343 |
| C | -1.031785 | -3.536454 | -5.366474 |
| H | -1.421776 | -4.484850 | -4.989261 |
| C | -1.155556 | -3.553557 | -6.893368 |
| H | -2.206466 | -3.617316 | -7.187223 |
| H | -0.730300 | -2.662109 | -7.362605 |
| C | 0.420134  | -3.462731 | -4.919121 |
| C | 0.907986  | -4.307834 | -3.920951 |
| C | 2.241893  | -4.279568 | -3.549382 |
| H | 2.607403  | -4.987398 | -2.819196 |
| C | 3.094505  | -3.323489 | -4.081147 |
| C | 2.647494  | -2.425865 | -5.054323 |
| C | 1.316039  | -2.538848 | -5.461098 |
| H | 0.944475  | -1.841219 | -6.208209 |
| C | 3.573567  | -1.358696 | -5.619315 |
| H | 4.589504  | -1.669413 | -5.364955 |
| C | 3.480688  | -1.263114 | -7.145274 |
| H | 2.481719  | -0.987816 | -7.493936 |
| H | 4.181787  | -0.513053 | -7.519985 |
| C | 3.357925  | -0.015124 | -4.931651 |
| C | 4.093177  | 0.299309  | -3.783580 |
| C | 4.001190  | 1.548637  | -3.184462 |
| H | 4.648111  | 1.807646  | -2.356287 |
| C | 3.125169  | 2.495695  | -3.700722 |
| C | 2.346393  | 2.221390  | -4.827964 |

|   |           |           |           |
|---|-----------|-----------|-----------|
| C | 2.485516  | 0.960241  | -5.415132 |
| H | 1.904116  | 0.739545  | -6.305980 |
| C | 1.412335  | 3.281853  | -5.389195 |
| H | 1.788570  | 4.241253  | -5.028284 |
| C | 1.414731  | 3.323252  | -6.920665 |
| H | 2.432498  | 3.470487  | -7.290566 |
| H | 1.027146  | 2.406011  | -7.372247 |
| C | 0.008650  | 3.133457  | -4.820142 |
| C | -0.383116 | 3.884638  | -3.708166 |
| C | -1.682384 | 3.836959  | -3.225407 |
| H | -1.983969 | 4.474329  | -2.402372 |
| C | -2.596163 | 2.967711  | -3.807507 |
| C | -2.236633 | 2.142431  | -4.875696 |
| C | -0.933516 | 2.261984  | -5.364147 |
| H | -0.635713 | 1.634342  | -6.200192 |
| C | -4.049280 | 2.425172  | -2.064101 |
| C | -4.025165 | 3.244527  | -0.947905 |
| H | -3.883180 | 4.310731  | -1.070340 |
| C | -4.180848 | 2.707920  | 0.332753  |
| C | -4.375451 | 1.328009  | 0.482243  |
| C | -4.450543 | 0.517440  | -0.653310 |
| H | -4.656586 | -0.539454 | -0.528870 |
| C | -4.294077 | 1.055924  | -1.921928 |
| C | -1.484932 | -4.049166 | -1.807840 |
| C | -1.843381 | -3.596487 | -0.543865 |
| H | -2.775473 | -3.069222 | -0.397050 |
| C | -1.009318 | -3.819808 | 0.555950  |
| C | 0.184184  | -4.542708 | 0.379170  |
| C | 0.519288  | -5.004968 | -0.894275 |
| H | 1.425754  | -5.586530 | -1.022394 |
| C | -0.290322 | -4.749714 | -1.991946 |
| C | 4.437121  | -2.728412 | -2.314222 |
| C | 4.200152  | -3.538618 | -1.218251 |
| H | 4.085777  | -4.609431 | -1.336545 |
| C | 4.071169  | -2.924577 | 0.032292  |
| C | 4.227518  | -1.533433 | 0.139866  |
| C | 4.565001  | -0.717319 | -0.938017 |
| H | 4.704619  | 0.348215  | -0.809186 |
| C | 4.656203  | -1.335251 | -2.171489 |
| C | 2.420809  | 3.877996  | -1.932334 |
| C | 1.096918  | 4.333628  | -1.927937 |
| C | 0.405383  | 4.432088  | -0.727768 |
| H | -0.626599 | 4.766815  | -0.698713 |
| C | 1.028438  | 4.098177  | 0.473942  |

|   |           |           |           |
|---|-----------|-----------|-----------|
| C | 2.379173  | 3.734673  | 0.476411  |
| C | 3.066949  | 3.620208  | -0.729296 |
| H | 4.112545  | 3.335714  | -0.725139 |
| O | -3.901090 | 2.949249  | -3.330212 |
| O | -4.514968 | 0.323154  | -3.062435 |
| O | -2.332091 | -3.920119 | -2.884991 |
| O | 0.057557  | -5.188989 | -3.256787 |
| O | 4.398319  | -3.253097 | -3.597874 |
| O | 5.001208  | -0.628900 | -3.305010 |
| O | 3.093841  | 3.764227  | -3.132239 |
| O | 0.531706  | 4.743114  | -3.117425 |
| H | -3.925395 | 0.309850  | -7.312163 |
| H | 0.791719  | 4.149920  | -7.270713 |
| H | 3.728452  | -2.228870 | -7.592317 |
| H | -0.625233 | -4.419148 | -7.297307 |
| H | 3.948796  | -0.287677 | 1.817514  |
| H | 2.104621  | 0.449774  | -0.483678 |
| C | 1.181230  | 0.014530  | -0.079588 |
| H | 1.456710  | -0.972930 | 0.342985  |
| N | 0.678399  | 0.945810  | 0.914153  |
| C | 0.210997  | -0.250781 | -1.234181 |
| H | -0.727486 | -0.666639 | -0.829507 |
| C | 0.825825  | -1.303582 | -2.149753 |
| H | 0.139871  | -1.562307 | -2.962198 |
| H | 1.748628  | -0.917334 | -2.602853 |
| H | 1.078727  | -2.219599 | -1.601208 |
| C | -0.107705 | 1.018763  | -2.013832 |
| H | -0.852446 | 0.828005  | -2.795585 |
| H | -0.473030 | 1.823919  | -1.367238 |
| H | 0.802459  | 1.396296  | -2.499300 |
| H | 1.388945  | 1.389993  | 1.477742  |
| H | -1.664098 | 1.555777  | 0.194371  |

## TS<sub>2</sub>

|   |           |           |          |
|---|-----------|-----------|----------|
| C | -2.435360 | -2.061910 | 2.170768 |
| C | -2.754791 | -2.029667 | 3.648110 |
| H | -2.492145 | -1.046670 | 4.045337 |
| H | -3.831125 | -2.171599 | 3.776524 |
| H | -2.223057 | -2.799946 | 4.209176 |
| C | 0.608916  | -4.983990 | 2.584571 |
| C | 1.812674  | -5.372230 | 3.408008 |
| H | 1.747385  | -6.445853 | 3.597998 |
| H | 2.757875  | -5.133381 | 2.919082 |
| H | 1.758275  | -4.859767 | 4.371802 |

|   |           |           |          |
|---|-----------|-----------|----------|
| N | 0.882934  | -4.370838 | 1.401656 |
| H | 1.869466  | -4.195696 | 1.198128 |
| N | -1.644569 | -3.089734 | 1.804916 |
| H | -1.387767 | -3.790175 | 2.509469 |
| O | -2.875340 | -1.214583 | 1.385122 |
| O | -0.532028 | -5.221781 | 2.978358 |
| C | 3.417765  | 2.767143  | 2.164512 |
| C | 3.951893  | 2.797125  | 3.574921 |
| H | 5.043754  | 2.746531  | 3.550080 |
| H | 3.646288  | 3.706104  | 4.096422 |
| H | 3.582523  | 1.916875  | 4.105152 |
| C | 0.602711  | 4.865529  | 2.871521 |
| C | -0.367672 | 4.644939  | 4.018081 |
| H | -1.324388 | 4.248816  | 3.673125 |
| H | 0.071979  | 3.940115  | 4.731752 |
| H | -0.517954 | 5.591898  | 4.541538 |
| N | 0.219164  | 4.334430  | 1.710624 |
| H | -0.930169 | 3.467209  | 1.465382 |
| N | 3.065238  | 3.946978  | 1.652905 |
| H | 2.818503  | 4.715803  | 2.326094 |
| O | 3.317265  | 1.693121  | 1.533936 |
| O | 1.655126  | 5.504972  | 3.114272 |
| C | -3.506496 | 4.994906  | 1.271905 |
| C | -3.547197 | 5.828767  | 2.531892 |
| H | -4.239195 | 6.662721  | 2.384308 |
| H | -3.872538 | 5.255774  | 3.403154 |
| H | -2.549027 | 6.234062  | 2.697960 |
| C | -5.435476 | 1.432666  | 2.684536 |
| C | -5.386520 | 0.486359  | 3.864809 |
| H | -4.353876 | 0.266126  | 4.146322 |
| H | -5.911738 | 0.946627  | 4.699953 |
| H | -5.877826 | -0.456161 | 3.605470 |
| N | -4.647273 | 1.067016  | 1.636580 |
| H | -4.109055 | 0.200130  | 1.708992 |
| N | -4.379009 | 3.942949  | 1.248181 |
| H | -4.995156 | 3.756561  | 2.035289 |
| O | -2.758100 | 5.270127  | 0.344232 |
| O | -6.139731 | 2.435806  | 2.691169 |
| C | 3.521074  | -2.127526 | 2.007015 |
| N | 3.616093  | -3.166505 | 1.198079 |
| N | 3.792054  | -0.943783 | 1.392733 |
| C | -1.808462 | 1.513379  | 3.566014 |
| C | -0.751700 | 0.897564  | 2.944400 |
| C | 0.172515  | 0.087699  | 3.723459 |

|   |           |           |           |
|---|-----------|-----------|-----------|
| C | -0.030165 | 0.031333  | 5.150049  |
| C | -1.113325 | 0.745393  | 5.748249  |
| C | -1.982999 | 1.453407  | 4.977193  |
| C | 1.219872  | -0.674849 | 3.181989  |
| C | 0.813626  | -0.748877 | 5.942306  |
| C | 1.866839  | -1.482560 | 5.400335  |
| C | 2.084908  | -1.430261 | 3.983969  |
| C | 3.187463  | -2.189264 | 3.443252  |
| C | 3.966012  | -2.959044 | 4.263852  |
| C | 3.723364  | -3.024382 | 5.665086  |
| C | 2.710603  | -2.298892 | 6.217300  |
| H | 1.363802  | -0.706058 | 2.109847  |
| H | -2.499914 | 2.088451  | 2.960912  |
| H | -1.229318 | 0.698242  | 6.827324  |
| H | -2.811342 | 1.991143  | 5.428007  |
| H | 0.633615  | -0.792729 | 7.013846  |
| H | 4.787479  | -3.520108 | 3.828846  |
| H | 4.360976  | -3.643180 | 6.287184  |
| H | 2.523850  | -2.325980 | 7.287003  |
| C | -0.609901 | 0.968997  | 1.455963  |
| H | -1.376207 | 0.478637  | 0.862304  |
| O | -1.652927 | 2.727202  | 1.171345  |
| C | -3.460772 | 1.377475  | -5.512438 |
| H | -4.459290 | 1.706872  | -5.219450 |
| C | -3.415791 | 1.313291  | -7.040835 |
| H | -3.661624 | 2.292952  | -7.457490 |
| H | -2.434026 | 1.030301  | -7.430009 |
| C | -3.230349 | 0.029524  | -4.842258 |
| C | -3.898693 | -0.300363 | -3.657725 |
| C | -3.674639 | -1.514918 | -3.020493 |
| H | -4.244968 | -1.783393 | -2.139787 |
| C | -2.748667 | -2.405676 | -3.548261 |
| C | -2.086223 | -2.142247 | -4.751639 |
| C | -2.337261 | -0.910839 | -5.357933 |
| H | -1.832752 | -0.683453 | -6.292378 |
| C | -1.204309 | -3.205646 | -5.393252 |
| H | -1.571672 | -4.164530 | -5.019875 |
| C | -1.327281 | -3.224357 | -6.921142 |
| H | -2.375845 | -3.317589 | -7.214953 |
| H | -0.928139 | -2.320377 | -7.389251 |
| C | 0.248428  | -3.108716 | -4.951818 |
| C | 0.739129  | -3.948737 | -3.950901 |
| C | 2.074916  | -3.932537 | -3.587334 |
| H | 2.439710  | -4.641654 | -2.858075 |

|   |           |           |           |
|---|-----------|-----------|-----------|
| C | 2.933189  | -2.990560 | -4.135993 |
| C | 2.485922  | -2.097984 | -5.113409 |
| C | 1.149144  | -2.199845 | -5.510422 |
| H | 0.781940  | -1.508830 | -6.265673 |
| C | 3.417900  | -1.042763 | -5.690620 |
| H | 4.432891  | -1.356220 | -5.436329 |
| C | 3.321169  | -0.955062 | -7.216522 |
| H | 2.322605  | -0.677005 | -7.563997 |
| H | 4.024293  | -0.209604 | -7.596283 |
| C | 3.200222  | 0.300516  | -5.005970 |
| C | 3.925818  | 0.617547  | -3.853265 |
| C | 3.817345  | 1.861425  | -3.247112 |
| H | 4.462411  | 2.128334  | -2.420064 |
| C | 2.922456  | 2.795734  | -3.754449 |
| C | 2.135880  | 2.508466  | -4.872599 |
| C | 2.305727  | 1.260928  | -5.479353 |
| H | 1.723416  | 1.035090  | -6.368452 |
| C | 1.161885  | 3.549808  | -5.395438 |
| H | 1.515285  | 4.513032  | -5.022094 |
| C | 1.137400  | 3.622419  | -6.925752 |
| H | 2.142412  | 3.822008  | -7.306096 |
| H | 0.784330  | 2.698456  | -7.391935 |
| C | -0.228321 | 3.352290  | -4.806271 |
| C | -0.630764 | 4.075780  | -3.675725 |
| C | -1.945097 | 4.033713  | -3.223164 |
| H | -2.248578 | 4.649906  | -2.382413 |
| C | -2.857210 | 3.203647  | -3.868724 |
| C | -2.475663 | 2.381715  | -4.929585 |
| C | -1.159925 | 2.488176  | -5.380955 |
| H | -0.849695 | 1.877363  | -6.224803 |
| C | -4.403831 | 2.693182  | -2.223032 |
| C | -4.391300 | 3.547143  | -1.137296 |
| H | -4.272954 | 4.608324  | -1.305208 |
| C | -4.485812 | 3.055450  | 0.165206  |
| C | -4.637401 | 1.672378  | 0.355104  |
| C | -4.751613 | 0.828608  | -0.756952 |
| H | -4.935824 | -0.227871 | -0.595080 |
| C | -4.635179 | 1.326062  | -2.048227 |
| C | -1.711094 | -3.710609 | -1.862251 |
| C | -2.088996 | -3.266887 | -0.601348 |
| H | -3.043180 | -2.775646 | -0.462382 |
| C | -1.254752 | -3.459950 | 0.503401  |
| C | -0.031558 | -4.130165 | 0.340368  |
| C | 0.334837  | -4.569223 | -0.931727 |

|   |           |           |           |
|---|-----------|-----------|-----------|
| H | 1.264289  | -5.113766 | -1.055437 |
| C | -0.483509 | -4.359640 | -2.032113 |
| C | 4.296381  | -2.410292 | -2.381125 |
| C | 4.083204  | -3.228614 | -1.286180 |
| H | 3.988949  | -4.301053 | -1.409170 |
| C | 3.948431  | -2.622618 | -0.032126 |
| C | 4.066363  | -1.226594 | 0.077737  |
| C | 4.386017  | -0.400606 | -1.000138 |
| H | 4.501473  | 0.668556  | -0.871296 |
| C | 4.493939  | -1.013186 | -2.236445 |
| C | 2.254355  | 4.166489  | -1.968910 |
| C | 0.902681  | 4.538898  | -1.903041 |
| C | 0.269481  | 4.627352  | -0.672063 |
| H | -0.766812 | 4.947784  | -0.606187 |
| C | 0.965467  | 4.383643  | 0.528628  |
| C | 2.337829  | 4.087578  | 0.440645  |
| C | 2.970101  | 3.979105  | -0.795303 |
| H | 4.033043  | 3.766896  | -0.836511 |
| O | -4.193381 | 3.199403  | -3.484730 |
| O | -4.869384 | 0.554576  | -3.167887 |
| O | -2.571134 | -3.636260 | -2.934843 |
| O | -0.118342 | -4.817878 | -3.282790 |
| O | 4.243442  | -2.930631 | -3.665801 |
| O | 4.835902  | -0.307236 | -3.368371 |
| O | 2.877657  | 4.063989  | -3.198494 |
| O | 0.273121  | 4.931377  | -3.070631 |
| H | -4.141630 | 0.584324  | -7.410137 |
| H | 0.473986  | 4.427905  | -7.249760 |
| H | 3.564117  | -1.923809 | -7.659753 |
| H | -0.772291 | -4.074119 | -7.325713 |
| H | 3.728720  | 0.007574  | 1.778005  |
| H | 1.093617  | 1.890801  | -0.942925 |
| C | 0.968884  | 0.911447  | -0.461445 |
| H | 1.961163  | 0.452162  | -0.408932 |
| N | 0.571215  | 1.125607  | 0.933365  |
| C | 0.008353  | 0.042115  | -1.265772 |
| H | -0.380166 | -0.758781 | -0.617675 |
| C | 0.775584  | -0.609120 | -2.414323 |
| H | 0.090882  | -1.179898 | -3.049013 |
| H | 1.248337  | 0.158628  | -3.040394 |
| H | 1.555247  | -1.290020 | -2.050953 |
| C | -1.151031 | 0.860927  | -1.828238 |
| H | -1.827235 | 0.212971  | -2.387994 |
| H | -1.739627 | 1.372425  | -1.058377 |

|          |           |           |           |
|----------|-----------|-----------|-----------|
| H        | -0.760924 | 1.619970  | -2.516562 |
| H        | 1.325486  | 1.504536  | 1.506340  |
| H        | -1.923652 | 2.976233  | 0.274950  |
| <b>5</b> |           |           |           |
| C        | -2.355696 | -2.053008 | 2.285937  |
| C        | -2.707222 | -2.077019 | 3.756362  |
| H        | -3.091774 | -1.104060 | 4.054113  |
| H        | -3.482992 | -2.831986 | 3.919594  |
| H        | -1.843245 | -2.333672 | 4.374648  |
| C        | 0.853569  | -4.859275 | 2.804676  |
| C        | 2.048166  | -5.325541 | 3.599046  |
| H        | 1.869336  | -6.369146 | 3.866549  |
| H        | 2.989326  | -5.230913 | 3.056420  |
| H        | 2.099750  | -4.749376 | 4.527197  |
| N        | 1.127972  | -4.292716 | 1.594236  |
| H        | 2.115752  | -4.249938 | 1.340925  |
| N        | -1.385358 | -2.937525 | 1.955658  |
| H        | -1.079969 | -3.586146 | 2.692647  |
| O        | -2.919216 | -1.308206 | 1.479993  |
| O        | -0.286388 | -4.996508 | 3.243762  |
| C        | 3.545471  | 2.332806  | 2.349618  |
| C        | 4.060723  | 2.333368  | 3.766285  |
| H        | 5.153302  | 2.292214  | 3.755128  |
| H        | 3.737442  | 3.224833  | 4.306321  |
| H        | 3.693894  | 1.434413  | 4.268247  |
| C        | 0.654601  | 4.442161  | 3.050120  |
| C        | -0.373374 | 4.289393  | 4.155637  |
| H        | -1.310331 | 3.871549  | 3.780728  |
| H        | 0.032799  | 3.638541  | 4.936338  |
| H        | -0.554245 | 5.267087  | 4.610428  |
| N        | 0.275184  | 3.980446  | 1.869182  |
| H        | -1.041822 | 3.081262  | 1.513402  |
| N        | 3.104366  | 3.493529  | 1.890353  |
| H        | 2.783775  | 4.246446  | 2.597312  |
| O        | 3.534693  | 1.269162  | 1.675604  |
| O        | 1.751052  | 4.992776  | 3.364020  |
| C        | -3.495197 | 4.876426  | 1.259544  |
| C        | -3.529331 | 5.716469  | 2.514391  |
| H        | -3.998275 | 6.676693  | 2.284419  |
| H        | -4.074983 | 5.240648  | 3.331382  |
| H        | -2.496966 | 5.907780  | 2.810593  |
| C        | -5.477274 | 1.382787  | 2.662777  |
| C        | -5.396047 | 0.477425  | 3.874567  |



|   |           |           |           |
|---|-----------|-----------|-----------|
| H | -4.507347 | 0.731366  | 4.461829  |
| H | -6.278638 | 0.647604  | 4.489141  |
| H | -5.332522 | -0.575277 | 3.590082  |
| N | -4.699023 | 0.996016  | 1.619154  |
| H | -4.157532 | 0.134938  | 1.710021  |
| N | -4.423640 | 3.877115  | 1.199210  |
| H | -5.055674 | 3.700654  | 1.975919  |
| O | -2.690702 | 5.101412  | 0.363897  |
| O | -6.179903 | 2.387613  | 2.662146  |
| C | 4.056247  | -2.483380 | 2.149498  |
| N | 4.091060  | -3.515378 | 1.327107  |
| N | 4.293379  | -1.294083 | 1.532222  |
| C | -1.354219 | 0.963146  | 3.613156  |
| C | -0.280051 | 0.335615  | 3.032843  |
| C | 0.693386  | -0.368281 | 3.842295  |
| C | 0.516547  | -0.344595 | 5.269335  |
| C | -0.581345 | 0.380619  | 5.830505  |
| C | -1.486538 | 1.010353  | 5.030008  |
| C | 1.751683  | -1.112945 | 3.312628  |
| C | 1.398963  | -1.056423 | 6.083710  |
| C | 2.465223  | -1.785317 | 5.553328  |
| C | 2.660329  | -1.791913 | 4.133109  |
| C | 3.777971  | -2.528603 | 3.598774  |
| C | 4.593302  | -3.245942 | 4.429851  |
| C | 4.370134  | -3.266137 | 5.836080  |
| C | 3.347647  | -2.547046 | 6.381921  |
| H | 1.864174  | -1.205042 | 2.239000  |
| H | -2.072817 | 1.467260  | 2.969146  |
| H | -0.678746 | 0.411316  | 6.912091  |
| H | -2.310838 | 1.566119  | 5.465940  |
| H | 1.240972  | -1.054738 | 7.159534  |
| H | 5.424326  | -3.799021 | 4.003232  |
| H | 5.032230  | -3.845984 | 6.469974  |
| H | 3.182880  | -2.541288 | 7.455502  |
| C | -0.176009 | 0.363080  | 1.563375  |
| H | -1.054059 | 0.120201  | 0.970695  |
| O | -1.752355 | 2.451316  | 1.159894  |
| C | -3.212200 | 1.182149  | -5.477942 |
| H | -4.217703 | 1.521704  | -5.223222 |
| C | -3.112629 | 1.104230  | -7.002712 |
| H | -3.338402 | 2.081245  | -7.436437 |
| H | -2.118804 | 0.813945  | -7.353740 |
| C | -3.010660 | -0.158653 | -4.784638 |
| C | -3.702718 | -0.455794 | -3.604508 |

|   |           |           |           |
|---|-----------|-----------|-----------|
| C | -3.484299 | -1.648406 | -2.925641 |
| H | -4.063364 | -1.892513 | -2.043282 |
| C | -2.547951 | -2.552059 | -3.411847 |
| C | -1.877688 | -2.331546 | -4.619497 |
| C | -2.118626 | -1.117920 | -5.265694 |
| H | -1.601827 | -0.919116 | -6.200056 |
| C | -0.994803 | -3.417907 | -5.220378 |
| H | -1.366830 | -4.361726 | -4.814190 |
| C | -1.117657 | -3.489470 | -6.747065 |
| H | -2.166498 | -3.588737 | -7.037797 |
| H | -0.714898 | -2.603465 | -7.245299 |
| C | 0.461374  | -3.319609 | -4.787438 |
| C | 0.946995  | -4.135165 | -3.764587 |
| C | 2.288499  | -4.143123 | -3.424614 |
| H | 2.647105  | -4.839214 | -2.679555 |
| C | 3.160692  | -3.238956 | -4.013109 |
| C | 2.716127  | -2.352193 | -4.998219 |
| C | 1.372951  | -2.442302 | -5.378594 |
| H | 1.008353  | -1.761030 | -6.144155 |
| C | 3.646835  | -1.300510 | -5.587837 |
| H | 4.663920  | -1.618327 | -5.347435 |
| C | 3.530437  | -1.204783 | -7.111271 |
| H | 2.528633  | -0.921195 | -7.444523 |
| H | 4.231200  | -0.459839 | -7.496353 |
| C | 3.437821  | 0.039002  | -4.889264 |
| C | 4.150078  | 0.326369  | -3.720432 |
| C | 4.029274  | 1.550056  | -3.076652 |
| H | 4.664682  | 1.798131  | -2.236703 |
| C | 3.139052  | 2.498146  | -3.566464 |
| C | 2.379915  | 2.247998  | -4.712572 |
| C | 2.559318  | 1.018517  | -5.354235 |
| H | 1.991651  | 0.820593  | -6.259395 |
| C | 1.421382  | 3.310078  | -5.219277 |
| H | 1.778224  | 4.259189  | -4.814300 |
| C | 1.419429  | 3.425090  | -6.747399 |
| H | 2.432469  | 3.618749  | -7.109350 |
| H | 1.057142  | 2.520015  | -7.242619 |
| C | 0.017369  | 3.116060  | -4.661366 |
| C | -0.413340 | 3.843476  | -3.543868 |
| C | -1.746508 | 3.831169  | -3.145959 |
| H | -2.069892 | 4.450464  | -2.314277 |
| C | -2.649070 | 3.019218  | -3.827430 |
| C | -2.239357 | 2.181446  | -4.865786 |
| C | -0.905426 | 2.262670  | -5.265567 |

|   |           |           |           |
|---|-----------|-----------|-----------|
| H | -0.572975 | 1.641126  | -6.093215 |
| C | -4.281480 | 2.566484  | -2.244160 |
| C | -4.337424 | 3.440226  | -1.175741 |
| H | -4.204996 | 4.498461  | -1.354159 |
| C | -4.500257 | 2.970302  | 0.128397  |
| C | -4.650340 | 1.590723  | 0.335448  |
| C | -4.704069 | 0.727194  | -0.765289 |
| H | -4.892634 | -0.327057 | -0.594312 |
| C | -4.516126 | 1.201468  | -2.055702 |
| C | -1.495318 | -3.772414 | -1.675772 |
| C | -1.858932 | -3.257904 | -0.437454 |
| H | -2.808657 | -2.753286 | -0.322023 |
| C | -1.015230 | -3.386817 | 0.672071  |
| C | 0.204062  | -4.075109 | 0.531975  |
| C | 0.557215  | -4.578286 | -0.720326 |
| H | 1.485798  | -5.129239 | -0.823876 |
| C | -0.269991 | -4.428995 | -1.823890 |
| C | 4.576815  | -2.714970 | -2.278897 |
| C | 4.418427  | -3.548707 | -1.185743 |
| H | 4.325664  | -4.620376 | -1.319126 |
| C | 4.349627  | -2.958265 | 0.082536  |
| C | 4.474596  | -1.563035 | 0.200334  |
| C | 4.729611  | -0.720882 | -0.881465 |
| H | 4.856544  | 0.345226  | -0.742863 |
| C | 4.773741  | -1.318126 | -2.128156 |
| C | 2.419545  | 3.816996  | -1.754092 |
| C | 1.074614  | 4.220988  | -1.717224 |
| C | 0.406111  | 4.287615  | -0.504227 |
| H | -0.624692 | 4.628975  | -0.463766 |
| C | 1.057144  | 4.002134  | 0.714392  |
| C | 2.424589  | 3.665164  | 0.656477  |
| C | 3.092570  | 3.575544  | -0.564250 |
| H | 4.150460  | 3.335853  | -0.579698 |
| O | -4.000756 | 3.047920  | -3.502315 |
| O | -4.689712 | 0.409554  | -3.172162 |
| O | -2.365789 | -3.753646 | -2.742308 |
| O | 0.081167  | -4.957615 | -3.050389 |
| O | 4.480726  | -3.212656 | -3.569305 |
| O | 5.067696  | -0.605956 | -3.266906 |
| O | 3.081300  | 3.745523  | -2.967742 |
| O | 0.487155  | 4.666462  | -2.890010 |
| H | -3.828233 | 0.375377  | -7.391792 |
| H | 0.773153  | 4.249723  | -7.057322 |
| H | 3.764061  | -2.171881 | -7.562910 |

|   |           |           |           |
|---|-----------|-----------|-----------|
| H | -0.565523 | -4.354736 | -7.121569 |
| H | 4.191361  | -0.346044 | 1.917745  |
| H | 1.360344  | 1.571689  | -0.826503 |
| C | 1.222043  | 0.544249  | -0.468491 |
| H | 2.198679  | 0.048752  | -0.526746 |
| N | 0.930443  | 0.619279  | 0.968678  |
| C | 0.175778  | -0.180605 | -1.299203 |
| H | -0.173547 | -1.062616 | -0.741257 |
| C | 0.840256  | -0.658052 | -2.585484 |
| H | 0.092336  | -1.096034 | -3.250504 |
| H | 1.292979  | 0.190819  | -3.112609 |
| H | 1.620212  | -1.406582 | -2.395563 |
| C | -1.000767 | 0.732376  | -1.636994 |
| H | -1.774710 | 0.164561  | -2.155142 |
| H | -1.444612 | 1.213279  | -0.760694 |
| H | -0.652255 | 1.522929  | -2.310751 |
| H | 1.766141  | 0.899207  | 1.507820  |
| H | -2.107880 | 2.930129  | 0.399469  |

**TS<sub>3</sub>**

|   |           |           |          |
|---|-----------|-----------|----------|
| C | -2.424295 | -2.332303 | 2.308222 |
| C | -2.732732 | -2.325921 | 3.788198 |
| H | -2.792658 | -1.292640 | 4.133696 |
| H | -3.704440 | -2.802446 | 3.948109 |
| H | -1.979925 | -2.861260 | 4.370220 |
| C | 0.785875  | -5.109888 | 2.758748 |
| C | 1.995799  | -5.524263 | 3.559181 |
| H | 1.906820  | -6.595749 | 3.752234 |
| H | 2.937542  | -5.309750 | 3.052799 |
| H | 1.970066  | -5.009635 | 4.523242 |
| N | 1.047690  | -4.506891 | 1.566479 |
| H | 2.035442  | -4.374370 | 1.339265 |
| N | -1.494079 | -3.242679 | 1.949685 |
| H | -1.183785 | -3.912312 | 2.664370 |
| O | -2.980995 | -1.568313 | 1.513497 |
| O | -0.351323 | -5.319170 | 3.178516 |
| C | 3.930919  | 2.456397  | 2.040719 |
| C | 4.410771  | 2.493780  | 3.471887 |
| H | 5.499814  | 2.588908  | 3.494896 |
| H | 3.976188  | 3.350218  | 3.994860 |
| H | 4.123505  | 1.567058  | 3.969224 |
| C | 1.361779  | 4.057373  | 2.830310 |
| C | 0.697433  | 3.460654  | 4.058666 |
| H | -0.390554 | 3.523060  | 3.969004 |

|   |           |           |          |
|---|-----------|-----------|----------|
| H | 0.953590  | 2.400258  | 4.163936 |
| H | 1.025136  | 4.009548  | 4.940936 |
| N | 1.036405  | 3.441420  | 1.665262 |
| H | -0.830224 | 3.179683  | 1.330459 |
| N | 3.857530  | 3.655555  | 1.420121 |
| H | 3.760154  | 4.450853  | 2.052838 |
| O | 3.646862  | 1.402090  | 1.464605 |
| O | 2.116998  | 5.029408  | 2.952467 |
| C | -4.026903 | 4.753142  | 1.605611 |
| C | -4.471214 | 5.505768  | 2.839046 |
| H | -5.012425 | 6.400832  | 2.523446 |
| H | -5.112203 | 4.911566  | 3.492493 |
| H | -3.582002 | 5.831701  | 3.380924 |
| C | -5.612470 | 0.959088  | 2.705480 |
| C | -5.535811 | -0.019033 | 3.858296 |
| H | -4.696140 | 0.249047  | 4.507768 |
| H | -6.459045 | 0.047699  | 4.431581 |
| H | -5.381054 | -1.041306 | 3.507051 |
| N | -4.765708 | 0.680294  | 1.682867 |
| H | -4.200416 | -0.169610 | 1.752309 |
| N | -4.639102 | 3.554480  | 1.415339 |
| H | -5.360625 | 3.249208  | 2.071169 |
| O | -3.171517 | 5.208938  | 0.852019 |
| O | -6.364754 | 1.929840  | 2.736887 |
| C | 3.728852  | -2.392885 | 2.112846 |
| N | 3.841833  | -3.440862 | 1.316242 |
| N | 3.969687  | -1.214514 | 1.478178 |
| C | -1.702836 | 1.094756  | 3.426391 |
| C | -0.649098 | 0.400695  | 2.903392 |
| C | 0.253188  | -0.345213 | 3.748339 |
| C | 0.021382  | -0.342209 | 5.163018 |
| C | -1.075796 | 0.419639  | 5.678095 |
| C | -1.899526 | 1.116081  | 4.841226 |
| C | 1.348470  | -1.050472 | 3.233433 |
| C | 0.881034  | -1.071373 | 5.989436 |
| C | 1.975009  | -1.774607 | 5.476984 |
| C | 2.232033  | -1.742538 | 4.064007 |
| C | 3.388736  | -2.440445 | 3.553366 |
| C | 4.192910  | -3.144870 | 4.406496 |
| C | 3.917526  | -3.197340 | 5.803583 |
| C | 2.849332  | -2.527516 | 6.323078 |
| H | 1.529620  | -1.059991 | 2.164842 |
| H | -2.346668 | 1.664494  | 2.760171 |
| H | -1.232627 | 0.438878  | 6.752903 |

|   |           |           |           |
|---|-----------|-----------|-----------|
| H | -2.713435 | 1.708074  | 5.249229  |
| H | 0.698927  | -1.086198 | 7.061505  |
| H | 5.055521  | -3.667821 | 4.004881  |
| H | 4.575533  | -3.766601 | 6.451388  |
| H | 2.644002  | -2.551076 | 7.389510  |
| C | -0.353892 | 0.293052  | 1.455164  |
| H | -0.849767 | -0.502634 | 0.893976  |
| O | -1.641761 | 2.835798  | 0.907631  |
| C | -3.223926 | 1.116494  | -5.407417 |
| H | -4.211187 | 1.468950  | -5.103802 |
| C | -3.193625 | 1.061229  | -6.936412 |
| H | -3.394637 | 2.053467  | -7.347473 |
| H | -2.231637 | 0.729466  | -7.336133 |
| C | -3.017726 | -0.241044 | -4.750268 |
| C | -3.711122 | -0.561201 | -3.580245 |
| C | -3.513778 | -1.775361 | -2.934836 |
| H | -4.094246 | -2.034295 | -2.058009 |
| C | -2.576890 | -2.669830 | -3.435466 |
| C | -1.891635 | -2.418995 | -4.629375 |
| C | -2.123836 | -1.189465 | -5.248730 |
| H | -1.596941 | -0.968484 | -6.172666 |
| C | -1.008829 | -3.493447 | -5.252138 |
| H | -1.378626 | -4.444808 | -4.862143 |
| C | -1.137099 | -3.537790 | -6.779278 |
| H | -2.186445 | -3.640218 | -7.066983 |
| H | -0.744705 | -2.639549 | -7.263750 |
| C | 0.446054  | -3.397697 | -4.816602 |
| C | 0.926013  | -4.213968 | -3.790842 |
| C | 2.262521  | -4.211851 | -3.431469 |
| H | 2.616055  | -4.904471 | -2.681107 |
| C | 3.137466  | -3.307378 | -4.015526 |
| C | 2.701939  | -2.437005 | -5.017109 |
| C | 1.362483  | -2.527426 | -5.409283 |
| H | 1.007645  | -1.856732 | -6.188373 |
| C | 3.648292  | -1.411475 | -5.619940 |
| H | 4.658583  | -1.731958 | -5.355151 |
| C | 3.555416  | -1.361717 | -7.147960 |
| H | 2.561106  | -1.078738 | -7.503743 |
| H | 4.268869  | -0.635576 | -7.545362 |
| C | 3.452444  | -0.044888 | -4.975146 |
| C | 4.187858  | 0.298585  | -3.834717 |
| C | 4.144304  | 1.581262  | -3.307022 |
| H | 4.804603  | 1.856539  | -2.494086 |
| C | 3.282557  | 2.522114  | -3.861906 |

|   |           |           |           |
|---|-----------|-----------|-----------|
| C | 2.441795  | 2.191789  | -4.925455 |
| C | 2.572013  | 0.913472  | -5.476976 |
| H | 1.959809  | 0.656865  | -6.337361 |
| C | 1.425302  | 3.204337  | -5.424934 |
| H | 1.778016  | 4.183536  | -5.094773 |
| C | 1.325948  | 3.237387  | -6.953426 |
| H | 2.304950  | 3.464506  | -7.382840 |
| H | 0.990540  | 2.288816  | -7.381490 |
| C | 0.066459  | 2.999871  | -4.759691 |
| C | -0.283816 | 3.714797  | -3.605494 |
| C | -1.585727 | 3.697683  | -3.111846 |
| H | -1.857751 | 4.323055  | -2.267562 |
| C | -2.541538 | 2.897971  | -3.733255 |
| C | -2.208573 | 2.084817  | -4.819083 |
| C | -0.904163 | 2.163699  | -5.307806 |
| H | -0.640159 | 1.563323  | -6.173902 |
| C | -4.154717 | 2.418374  | -2.086812 |
| C | -4.233797 | 3.247875  | -0.980260 |
| H | -4.076576 | 4.311307  | -1.105032 |
| C | -4.505914 | 2.723976  | 0.287028  |
| C | -4.669292 | 1.338164  | 0.427878  |
| C | -4.687925 | 0.527120  | -0.709605 |
| H | -4.909868 | -0.528103 | -0.595640 |
| C | -4.457154 | 1.056864  | -1.969420 |
| C | -1.547708 | -3.929079 | -1.713604 |
| C | -1.934666 | -3.461161 | -0.463042 |
| H | -2.896089 | -2.981262 | -0.338437 |
| C | -1.104537 | -3.625899 | 0.651768  |
| C | 0.129661  | -4.284097 | 0.502788  |
| C | 0.505741  | -4.739394 | -0.760013 |
| H | 1.443050  | -5.273529 | -0.869735 |
| C | -0.312224 | -4.565107 | -1.866657 |
| C | 4.507084  | -2.719313 | -2.274968 |
| C | 4.305284  | -3.526238 | -1.169895 |
| H | 4.228858  | -4.601556 | -1.281354 |
| C | 4.158198  | -2.906407 | 0.076428  |
| C | 4.243922  | -1.505986 | 0.163770  |
| C | 4.551080  | -0.686159 | -0.927278 |
| H | 4.640320  | 0.388809  | -0.814273 |
| C | 4.685813  | -1.316295 | -2.153052 |
| C | 2.758230  | 3.948764  | -2.112898 |
| C | 1.388925  | 4.185569  | -1.942833 |
| C | 0.834140  | 4.112128  | -0.670202 |
| H | -0.238634 | 4.201478  | -0.547773 |

|          |           |           |           |
|----------|-----------|-----------|-----------|
| C        | 1.634680  | 3.847297  | 0.451116  |
| C        | 3.026893  | 3.794810  | 0.269174  |
| C        | 3.580276  | 3.825081  | -1.001559 |
| H        | 4.653618  | 3.734120  | -1.128656 |
| O        | -3.869161 | 2.952564  | -3.324452 |
| O        | -4.667006 | 0.321019  | -3.116737 |
| O        | -2.404016 | -3.886675 | -2.792013 |
| O        | 0.057045  | -5.054540 | -3.103217 |
| O        | 4.451007  | -3.258628 | -3.552165 |
| O        | 5.055952  | -0.636547 | -3.294872 |
| O        | 3.285359  | 3.826493  | -3.382917 |
| O        | 0.651521  | 4.568027  | -3.045090 |
| H        | -3.957915 | 0.370463  | -7.301404 |
| H        | 0.618147  | 4.008569  | -7.267041 |
| H        | 3.785673  | -2.344758 | -7.565789 |
| H        | -0.579973 | -4.391624 | -7.172335 |
| H        | 3.894363  | -0.253716 | 1.838379  |
| H        | 1.293267  | 1.645065  | -0.915019 |
| C        | 1.126826  | 0.692438  | -0.404149 |
| H        | 2.118263  | 0.265699  | -0.207024 |
| N        | 0.567536  | 0.991417  | 0.924486  |
| C        | 0.271209  | -0.214348 | -1.275351 |
| H        | 0.068601  | -1.158885 | -0.747454 |
| C        | 1.045751  | -0.565512 | -2.541278 |
| H        | 0.397446  | -1.105150 | -3.238536 |
| H        | 1.384069  | 0.348870  | -3.044751 |
| H        | 1.919123  | -1.192283 | -2.328215 |
| C        | -1.038900 | 0.482859  | -1.640119 |
| H        | -1.742614 | -0.243748 | -2.046902 |
| H        | -1.513109 | 1.007311  | -0.802084 |
| H        | -0.834495 | 1.229652  | -2.415670 |
| H        | 0.868006  | 2.017219  | 1.441256  |
| H        | -2.134568 | 3.631806  | 0.652629  |
| <b>6</b> |           |           |           |
| C        | -2.602838 | -2.214017 | 2.358756  |
| C        | -2.932402 | -2.235588 | 3.833909  |
| H        | -3.340737 | -1.269631 | 4.124786  |
| H        | -3.685858 | -3.009232 | 4.013491  |
| H        | -2.054374 | -2.456611 | 4.445635  |
| C        | 0.794523  | -4.786071 | 2.902284  |
| C        | 2.008383  | -5.161407 | 3.716266  |
| H        | 1.900232  | -6.211942 | 3.994157  |
| H        | 2.947547  | -5.004462 | 3.184564  |



|   |           |           |          |
|---|-----------|-----------|----------|
| H | 2.008192  | -4.571618 | 4.637623 |
| N | 1.047152  | -4.201059 | 1.697142 |
| H | 2.033562  | -4.082265 | 1.460438 |
| N | -1.558490 | -3.009895 | 2.031119 |
| H | -1.199552 | -3.623543 | 2.772152 |
| O | -3.250982 | -1.546299 | 1.548281 |
| O | -0.339627 | -5.005137 | 3.323729 |
| C | 4.262185  | 2.740010  | 2.080706 |
| C | 4.835841  | 2.879101  | 3.472170 |
| H | 5.891420  | 3.157081  | 3.408972 |
| H | 4.309404  | 3.658527  | 4.030454 |
| H | 4.750093  | 1.925166  | 3.991477 |
| C | 1.532735  | 3.983993  | 2.940477 |
| C | 1.132617  | 3.147285  | 4.137811 |
| H | 0.062258  | 2.921343  | 4.120650 |
| H | 1.662466  | 2.187623  | 4.116971 |
| H | 1.382834  | 3.691996  | 5.046621 |
| N | 1.245242  | 3.390183  | 1.735831 |
| H | -0.863450 | 3.180124  | 1.538452 |
| N | 4.016292  | 3.912576  | 1.438382 |
| H | 3.922768  | 4.728737  | 2.036505 |
| O | 4.050973  | 1.654619  | 1.549324 |
| O | 2.064688  | 5.078771  | 3.045208 |
| C | -4.004515 | 4.862853  | 1.681089 |
| C | -4.495635 | 5.653395  | 2.871896 |
| H | -5.041300 | 6.527034  | 2.506605 |
| H | -5.150239 | 5.073352  | 3.524552 |
| H | -3.629683 | 6.012439  | 3.429243 |
| C | -5.771588 | 1.115452  | 2.685796 |
| C | -5.811142 | 0.120037  | 3.825232 |
| H | -5.057512 | 0.393989  | 4.570951 |
| H | -6.793128 | 0.172357  | 4.293412 |
| H | -5.606833 | -0.897576 | 3.485662 |
| N | -4.875359 | 0.816954  | 1.711419 |
| H | -4.371254 | -0.071139 | 1.785448 |
| N | -4.657054 | 3.693895  | 1.460790 |
| H | -5.417669 | 3.413117  | 2.083485 |
| O | -3.082282 | 5.271458  | 0.978252 |
| O | -6.483112 | 2.117105  | 2.688549 |
| C | 3.860070  | -2.215348 | 2.224687 |
| N | 3.938527  | -3.261468 | 1.423063 |
| N | 4.090912  | -1.036691 | 1.584172 |
| C | -1.756898 | 0.903489  | 3.473434 |
| C | -0.667687 | 0.260489  | 2.948159 |

|   |           |           |           |
|---|-----------|-----------|-----------|
| C | 0.289357  | -0.383410 | 3.819914  |
| C | 0.077115  | -0.334897 | 5.239049  |
| C | -1.062901 | 0.370281  | 5.740774  |
| C | -1.941948 | 0.972975  | 4.887550  |
| C | 1.417062  | -1.051028 | 3.328962  |
| C | 0.986672  | -0.975055 | 6.088529  |
| C | 2.120266  | -1.625779 | 5.595076  |
| C | 2.356667  | -1.632610 | 4.179663  |
| C | 3.553739  | -2.259196 | 3.674175  |
| C | 4.411440  | -2.888664 | 4.532543  |
| C | 4.150968  | -2.918103 | 5.934272  |
| C | 3.051274  | -2.296819 | 6.450131  |
| H | 1.575209  | -1.109674 | 2.261564  |
| H | -2.448465 | 1.406672  | 2.801125  |
| H | -1.208400 | 0.421896  | 6.816304  |
| H | -2.791762 | 1.522200  | 5.282977  |
| H | 0.807852  | -0.963112 | 7.161297  |
| H | 5.302389  | -3.366054 | 4.136625  |
| H | 4.848637  | -3.427566 | 6.590526  |
| H | 2.862745  | -2.301592 | 7.520060  |
| C | -0.420408 | 0.198612  | 1.481608  |
| H | -1.196098 | -0.262485 | 0.856588  |
| O | -1.632933 | 2.875671  | 1.038498  |
| C | -3.193148 | 1.248190  | -5.374520 |
| H | -4.183190 | 1.595647  | -5.073503 |
| C | -3.157772 | 1.191839  | -6.903001 |
| H | -3.356672 | 2.183370  | -7.316855 |
| H | -2.195036 | 0.857842  | -7.298981 |
| C | -2.979286 | -0.107969 | -4.713732 |
| C | -3.648127 | -0.405974 | -3.523302 |
| C | -3.429287 | -1.598908 | -2.849769 |
| H | -3.993403 | -1.839685 | -1.957873 |
| C | -2.517692 | -2.512993 | -3.360784 |
| C | -1.852782 | -2.285671 | -4.570484 |
| C | -2.095794 | -1.067604 | -5.211043 |
| H | -1.583278 | -0.863999 | -6.147154 |
| C | -0.964080 | -3.368542 | -5.170344 |
| H | -1.333592 | -4.314159 | -4.766005 |
| C | -1.080321 | -3.439602 | -6.697120 |
| H | -2.126937 | -3.553065 | -6.990822 |
| H | -0.689748 | -2.547127 | -7.193640 |
| C | 0.488837  | -3.261881 | -4.725273 |
| C | 0.967338  | -4.054788 | -3.680005 |
| C | 2.304802  | -4.049523 | -3.323468 |

|   |           |           |           |
|---|-----------|-----------|-----------|
| H | 2.656018  | -4.728958 | -2.560015 |
| C | 3.178659  | -3.152264 | -3.919205 |
| C | 2.742501  | -2.296299 | -4.932870 |
| C | 1.405781  | -2.400443 | -5.330155 |
| H | 1.050779  | -1.743532 | -6.120925 |
| C | 3.685218  | -1.267030 | -5.535147 |
| H | 4.696316  | -1.582175 | -5.266743 |
| C | 3.596629  | -1.219950 | -7.063551 |
| H | 2.602609  | -0.939762 | -7.422442 |
| H | 4.309593  | -0.493184 | -7.460789 |
| C | 3.485413  | 0.102513  | -4.895659 |
| C | 4.224646  | 0.457417  | -3.760306 |
| C | 4.186015  | 1.747616  | -3.249731 |
| H | 4.846169  | 2.028881  | -2.438190 |
| C | 3.326398  | 2.683727  | -3.815287 |
| C | 2.476132  | 2.341414  | -4.865749 |
| C | 2.602078  | 1.055482  | -5.401431 |
| H | 1.981812  | 0.788758  | -6.252867 |
| C | 1.454709  | 3.344052  | -5.374191 |
| H | 1.798756  | 4.327302  | -5.046097 |
| C | 1.365559  | 3.370440  | -6.903461 |
| H | 2.345202  | 3.606276  | -7.326570 |
| H | 1.044286  | 2.416143  | -7.329460 |
| C | 0.092935  | 3.133879  | -4.717251 |
| C | -0.256251 | 3.831558  | -3.554432 |
| C | -1.559456 | 3.831018  | -3.070209 |
| H | -1.825123 | 4.444272  | -2.214722 |
| C | -2.516735 | 3.036131  | -3.694154 |
| C | -2.184627 | 2.224178  | -4.782601 |
| C | -0.880819 | 2.307410  | -5.273316 |
| H | -0.618883 | 1.714108  | -6.144785 |
| C | -4.123382 | 2.563866  | -2.034805 |
| C | -4.202839 | 3.387515  | -0.924311 |
| H | -4.034114 | 4.450678  | -1.038842 |
| C | -4.505017 | 2.859742  | 0.335696  |
| C | -4.700971 | 1.477954  | 0.466884  |
| C | -4.695648 | 0.669928  | -0.673184 |
| H | -4.937813 | -0.381694 | -0.569550 |
| C | -4.431682 | 1.203501  | -1.923322 |
| C | -1.530882 | -3.765285 | -1.616235 |
| C | -1.955415 | -3.305303 | -0.376404 |
| H | -2.934064 | -2.859088 | -0.271764 |
| C | -1.134879 | -3.415566 | 0.751484  |
| C | 0.127638  | -4.026881 | 0.624089  |

|   |           |           |           |
|---|-----------|-----------|-----------|
| C | 0.531763  | -4.493840 | -0.627496 |
| H | 1.488906  | -4.996291 | -0.715928 |
| C | -0.278384 | -4.368527 | -1.747049 |
| C | 4.545140  | -2.547380 | -2.179560 |
| C | 4.353651  | -3.350064 | -1.070176 |
| H | 4.274741  | -4.425765 | -1.175863 |
| C | 4.231348  | -2.726774 | 0.177116  |
| C | 4.333662  | -1.327507 | 0.263181  |
| C | 4.616255  | -0.511068 | -0.837076 |
| H | 4.710458  | 0.563363  | -0.728200 |
| C | 4.725306  | -1.144334 | -2.063251 |
| C | 2.826568  | 4.096481  | -2.068402 |
| C | 1.444605  | 4.221559  | -1.879770 |
| C | 0.914431  | 4.025805  | -0.606211 |
| H | -0.159469 | 3.981664  | -0.458372 |
| C | 1.768209  | 3.831310  | 0.482452  |
| C | 3.153458  | 3.940137  | 0.304342  |
| C | 3.678844  | 4.042189  | -0.974906 |
| H | 4.752835  | 4.052976  | -1.124675 |
| O | -3.840437 | 3.094738  | -3.275134 |
| O | -4.612772 | 0.475863  | -3.077458 |
| O | -2.360801 | -3.730090 | -2.714870 |
| O | 0.103063  | -4.880567 | -2.971836 |
| O | 4.490198  | -3.092042 | -3.454522 |
| O | 5.092877  | -0.469169 | -3.210969 |
| O | 3.336024  | 3.997363  | -3.343849 |
| O | 0.696868  | 4.640631  | -2.956684 |
| H | -3.921294 | 0.500848  | -7.269123 |
| H | 0.651507  | 4.132324  | -7.225657 |
| H | 3.829901  | -2.203439 | -7.478670 |
| H | -0.515290 | -4.296451 | -7.071887 |
| H | 4.060947  | -0.086715 | 1.959695  |
| H | 1.594281  | 1.302961  | -0.688598 |
| C | 1.138051  | 0.374703  | -0.313692 |
| H | 1.973715  | -0.334212 | -0.217233 |
| N | 0.698010  | 0.617561  | 1.051314  |
| C | 0.132894  | -0.144998 | -1.331188 |
| H | -0.336791 | -1.063815 | -0.948356 |
| C | 0.889566  | -0.488340 | -2.609357 |
| H | 0.194020  | -0.760500 | -3.408649 |
| H | 1.456657  | 0.386949  | -2.952714 |
| H | 1.592578  | -1.317952 | -2.461166 |
| C | -0.925164 | 0.907772  | -1.633315 |
| H | -1.643382 | 0.522741  | -2.360492 |

|          |           |           |           |
|----------|-----------|-----------|-----------|
| H        | -1.463895 | 1.274284  | -0.753005 |
| H        | -0.425708 | 1.767288  | -2.090060 |
| H        | 1.086378  | 2.368247  | 1.746704  |
| H        | -2.103711 | 3.695230  | 0.807736  |
| <b>7</b> |           |           |           |
| C        | -2.098273 | -2.272071 | 2.294184  |
| C        | -2.294848 | -2.207028 | 3.793448  |
| H        | -2.270154 | -1.163872 | 4.112097  |
| H        | -3.276965 | -2.623278 | 4.037864  |
| H        | -1.531324 | -2.769147 | 4.334605  |
| C        | 0.893217  | -5.268390 | 2.676426  |
| C        | 2.101625  | -5.716055 | 3.461738  |
| H        | 1.989423  | -6.786707 | 3.648828  |
| H        | 3.043324  | -5.520270 | 2.947752  |
| H        | 2.097237  | -5.207266 | 4.429032  |
| N        | 1.153106  | -4.714635 | 1.460522  |
| H        | 2.140191  | -4.607990 | 1.220729  |
| N        | -1.275452 | -3.268118 | 1.904793  |
| H        | -0.980304 | -3.940337 | 2.621877  |
| O        | -2.664132 | -1.490713 | 1.521672  |
| O        | -0.242801 | -5.413636 | 3.125840  |
| C        | 3.254141  | 1.890027  | 2.074348  |
| C        | 3.483807  | 1.700987  | 3.561178  |
| H        | 4.448217  | 2.146117  | 3.820982  |
| H        | 2.701445  | 2.159909  | 4.169334  |
| H        | 3.529944  | 0.634117  | 3.791409  |
| C        | -0.088764 | 4.400828  | 2.842209  |
| C        | -1.357576 | 4.683757  | 3.614281  |
| H        | -1.642658 | 5.727044  | 3.449983  |
| H        | -2.186523 | 4.043394  | 3.301091  |
| H        | -1.146373 | 4.534637  | 4.672237  |
| N        | -0.274981 | 4.101310  | 1.526365  |
| H        | -1.217959 | 4.276932  | 1.182810  |
| N        | 2.323900  | 2.828004  | 1.790279  |
| H        | 1.942433  | 3.355169  | 2.583550  |
| O        | 3.903339  | 1.256219  | 1.241386  |
| O        | 1.003162  | 4.466186  | 3.400519  |
| C        | -3.656861 | 5.109596  | 1.444910  |
| C        | -4.293379 | 5.998243  | 2.489443  |
| H        | -4.505656 | 5.448310  | 3.410079  |
| H        | -3.634927 | 6.841203  | 2.693323  |
| H        | -5.241663 | 6.379780  | 2.099824  |
| C        | -4.970899 | 1.252458  | 2.786179  |

|   |           |           |           |
|---|-----------|-----------|-----------|
| C | -4.870125 | 0.293509  | 3.950609  |
| H | -4.814952 | -0.740055 | 3.601306  |
| H | -3.960947 | 0.503492  | 4.523548  |
| H | -5.739231 | 0.431398  | 4.591325  |
| N | -4.113729 | 0.978041  | 1.764702  |
| H | -3.600190 | 0.091160  | 1.815011  |
| N | -4.175954 | 3.854873  | 1.383892  |
| H | -4.907928 | 3.574845  | 2.043863  |
| O | -2.744151 | 5.498963  | 0.720289  |
| O | -5.750219 | 2.201578  | 2.796652  |
| C | 3.953721  | -2.684988 | 2.122804  |
| N | 3.979859  | -3.708986 | 1.288882  |
| N | 4.209879  | -1.496366 | 1.506365  |
| C | -1.104110 | 1.173471  | 3.453499  |
| C | -0.156198 | 0.354007  | 2.897711  |
| C | 0.704681  | -0.428211 | 3.759161  |
| C | 0.554299  | -0.309704 | 5.183942  |
| C | -0.438260 | 0.579378  | 5.705751  |
| C | -1.236949 | 1.301875  | 4.866473  |
| C | 1.680898  | -1.297076 | 3.261196  |
| C | 1.376726  | -1.067344 | 6.026910  |
| C | 2.383385  | -1.895314 | 5.522690  |
| C | 2.562413  | -1.974143 | 4.102654  |
| C | 3.663643  | -2.741689 | 3.573850  |
| C | 4.461967  | -3.460426 | 4.419009  |
| C | 4.231077  | -3.444538 | 5.826649  |
| C | 3.240820  | -2.673997 | 6.363422  |
| H | 1.785025  | -1.401313 | 2.192401  |
| H | -1.760818 | 1.739029  | 2.794511  |
| H | -0.536443 | 0.673250  | 6.783700  |
| H | -1.978731 | 1.984459  | 5.271846  |
| H | 1.234405  | -1.001138 | 7.103190  |
| H | 5.289202  | -4.033291 | 4.011183  |
| H | 4.875711  | -4.031275 | 6.472554  |
| H | 3.091285  | -2.634017 | 7.438731  |
| C | -0.057887 | 0.265831  | 1.419421  |
| H | -1.007316 | 0.364776  | 0.875121  |
| C | -3.153657 | 1.161785  | -5.435954 |
| H | -4.157539 | 1.470949  | -5.135266 |
| C | -3.114550 | 1.106254  | -6.964712 |
| H | -3.383671 | 2.081534  | -7.376842 |
| H | -2.126297 | 0.847766  | -7.355078 |
| C | -2.899334 | -0.187391 | -4.773747 |
| C | -3.457372 | -0.436148 | -3.515174 |

|   |           |           |           |
|---|-----------|-----------|-----------|
| C | -3.254996 | -1.636547 | -2.852641 |
| H | -3.769630 | -1.846210 | -1.924284 |
| C | -2.463551 | -2.612469 | -3.442901 |
| C | -1.906015 | -2.431976 | -4.712133 |
| C | -2.142096 | -1.209326 | -5.349137 |
| H | -1.726337 | -1.052827 | -6.340237 |
| C | -1.081297 | -3.546804 | -5.339159 |
| H | -1.479846 | -4.483611 | -4.941827 |
| C | -1.199967 | -3.594242 | -6.865500 |
| H | -2.250535 | -3.645334 | -7.163395 |
| H | -0.755391 | -2.720560 | -7.350033 |
| C | 0.374864  | -3.481577 | -4.892553 |
| C | 0.854993  | -4.322747 | -3.887195 |
| C | 2.190666  | -4.317306 | -3.523388 |
| H | 2.546872  | -5.022211 | -2.785673 |
| C | 3.062562  | -3.391281 | -4.073379 |
| C | 2.626508  | -2.490439 | -5.049862 |
| C | 1.288117  | -2.579719 | -5.445816 |
| H | 0.924780  | -1.877649 | -6.193358 |
| C | 3.570998  | -1.443129 | -5.628013 |
| H | 4.582473  | -1.773443 | -5.380115 |
| C | 3.466301  | -1.346856 | -7.152200 |
| H | 2.467401  | -1.060839 | -7.492490 |
| H | 4.172740  | -0.605167 | -7.533670 |
| C | 3.375447  | -0.102789 | -4.929026 |
| C | 4.065061  | 0.159965  | -3.740363 |
| C | 3.939313  | 1.376824  | -3.082440 |
| H | 4.557553  | 1.605433  | -2.224357 |
| C | 3.073824  | 2.339914  | -3.584944 |
| C | 2.366266  | 2.129323  | -4.771825 |
| C | 2.539174  | 0.902086  | -5.417771 |
| H | 2.013041  | 0.730849  | -6.352517 |
| C | 1.491583  | 3.241389  | -5.326294 |
| H | 1.911608  | 4.176420  | -4.949103 |
| C | 1.505912  | 3.305273  | -6.857399 |
| H | 2.533375  | 3.378451  | -7.223041 |
| H | 1.046319  | 2.428405  | -7.321574 |
| C | 0.072312  | 3.162522  | -4.783827 |
| C | -0.350628 | 4.001551  | -3.748935 |
| C | -1.670788 | 4.002156  | -3.324976 |
| H | -1.992533 | 4.684822  | -2.547331 |
| C | -2.576148 | 3.104018  | -3.876318 |
| C | -2.191120 | 2.201481  | -4.870535 |
| C | -0.863272 | 2.266108  | -5.300381 |

|   |           |           |           |
|---|-----------|-----------|-----------|
| H | -0.534895 | 1.566653  | -6.066042 |
| C | -3.980236 | 2.622691  | -2.105475 |
| C | -3.974975 | 3.477616  | -1.019714 |
| H | -3.923189 | 4.546567  | -1.184578 |
| C | -4.048970 | 2.975045  | 0.284766  |
| C | -4.104572 | 1.589141  | 0.484212  |
| C | -4.154446 | 0.734235  | -0.623657 |
| H | -4.262539 | -0.330465 | -0.451638 |
| C | -4.120277 | 1.243004  | -1.911154 |
| C | -1.482541 | -3.960931 | -1.747338 |
| C | -1.809380 | -3.479311 | -0.485791 |
| H | -2.728986 | -2.932612 | -0.329206 |
| C | -0.959204 | -3.697830 | 0.603306  |
| C | 0.216631  | -4.448144 | 0.422642  |
| C | 0.520186  | -4.938748 | -0.847918 |
| H | 1.411009  | -5.542828 | -0.980859 |
| C | -0.307944 | -4.693374 | -1.933855 |
| C | 4.461901  | -2.889767 | -2.313198 |
| C | 4.294115  | -3.730718 | -1.227230 |
| H | 4.185474  | -4.800024 | -1.368280 |
| C | 4.243118  | -3.148512 | 0.046987  |
| C | 4.389244  | -1.757526 | 0.174084  |
| C | 4.651705  | -0.909176 | -0.900709 |
| H | 4.790087  | 0.152302  | -0.746536 |
| C | 4.675609  | -1.497638 | -2.149622 |
| C | 2.234827  | 3.692854  | -1.831392 |
| C | 1.013268  | 4.367453  | -1.907300 |
| C | 0.259046  | 4.529130  | -0.755401 |
| H | -0.685793 | 5.062406  | -0.800087 |
| C | 0.669707  | 3.993795  | 0.466652  |
| C | 1.900777  | 3.314292  | 0.545828  |
| C | 2.680397  | 3.200994  | -0.610368 |
| H | 3.637705  | 2.703618  | -0.540998 |
| O | -3.883158 | 3.111216  | -3.392352 |
| O | -4.362895 | 0.482727  | -3.024812 |
| O | -2.339090 | -3.841675 | -2.818482 |
| O | -0.002760 | -5.172986 | -3.194463 |
| O | 4.374233  | -3.372473 | -3.611231 |
| O | 4.970529  | -0.780143 | -3.288767 |
| O | 3.008408  | 3.581471  | -2.968595 |
| O | 0.558154  | 4.849145  | -3.123350 |
| H | -3.824825 | 0.362356  | -7.335155 |
| H | 0.949968  | 4.182830  | -7.196062 |
| H | 3.699019  | -2.315391 | -7.601139 |



|   |           |           |           |
|---|-----------|-----------|-----------|
| H | -0.683391 | -4.477160 | -7.248949 |
| H | 4.171549  | -0.544183 | 1.870603  |
| H | 1.967049  | 0.528237  | -0.914185 |
| C | 1.214977  | -0.185562 | -0.543432 |
| H | 1.706624  | -1.169782 | -0.616060 |
| N | 1.065198  | 0.056906  | 0.872263  |
| C | -0.006067 | -0.168681 | -1.454385 |
| H | -0.792437 | -0.806288 | -1.018358 |
| C | 0.430619  | -0.759930 | -2.789902 |
| H | -0.354462 | -0.664687 | -3.544145 |
| H | 1.313421  | -0.224246 | -3.161991 |
| H | 0.698205  | -1.818698 | -2.691468 |
| C | -0.544905 | 1.238761  | -1.680345 |
| H | -1.395783 | 1.209044  | -2.366406 |
| H | -0.860750 | 1.754775  | -0.766256 |
| H | 0.234017  | 1.845659  | -2.154766 |

**1·H<sub>2</sub>O**

|   |           |           |          |
|---|-----------|-----------|----------|
| C | -2.824247 | -2.643659 | 2.334345 |
| C | -3.016108 | -2.693823 | 3.838977 |
| H | -2.825775 | -1.699204 | 4.251447 |
| H | -4.053590 | -2.959683 | 4.049509 |
| H | -2.351068 | -3.409239 | 4.326694 |
| C | 0.784896  | -4.977059 | 2.702016 |
| C | 2.038022  | -5.324033 | 3.469840 |
| H | 1.957367  | -6.371989 | 3.764565 |
| H | 2.951898  | -5.160076 | 2.897109 |
| H | 2.069728  | -4.723767 | 4.384238 |
| N | 0.977786  | -4.317177 | 1.520673 |
| H | 1.952260  | -4.182039 | 1.256281 |
| N | -1.692885 | -3.288436 | 1.926276 |
| H | -1.258434 | -3.893904 | 2.625629 |
| O | -3.619669 | -2.067986 | 1.601470 |
| O | -0.324645 | -5.270304 | 3.137103 |
| C | 3.293153  | 2.419425  | 2.175582 |
| C | 3.771659  | 2.377654  | 3.607555 |
| H | 4.847020  | 2.185066  | 3.612663 |
| H | 3.564842  | 3.298889  | 4.153632 |
| H | 3.280713  | 1.536603  | 4.106646 |
| C | 0.705869  | 5.701559  | 2.649707 |
| C | -0.371143 | 6.285475  | 3.533594 |
| H | -1.279978 | 6.498360  | 2.968309 |
| H | -0.600384 | 5.577908  | 4.336802 |
| H | 0.020340  | 7.194580  | 3.989326 |

|   |           |           |          |
|---|-----------|-----------|----------|
| N | 0.244192  | 5.042489  | 1.558616 |
| H | -0.765864 | 5.059547  | 1.389767 |
| N | 2.723579  | 3.569021  | 1.787255 |
| H | 2.648923  | 4.356010  | 2.448296 |
| O | 3.407776  | 1.421279  | 1.443917 |
| O | 1.898593  | 5.810487  | 2.940243 |
| C | -3.471839 | 4.907484  | 1.773859 |
| C | -3.853206 | 5.500000  | 3.118562 |
| H | -3.112301 | 5.199919  | 3.865556 |
| H | -3.834063 | 6.587691  | 3.040350 |
| H | -4.836348 | 5.170111  | 3.458639 |
| C | -5.201787 | 1.158342  | 2.667594 |
| C | -5.223375 | 0.086596  | 3.733301 |
| H | -5.076509 | -0.899896 | 3.289238 |
| H | -4.417706 | 0.264350  | 4.454163 |
| H | -6.176068 | 0.142151  | 4.258282 |
| N | -4.326732 | 0.925897  | 1.659359 |
| H | -3.782124 | 0.058786  | 1.667633 |
| N | -4.154164 | 3.786256  | 1.468837 |
| H | -4.877174 | 3.454762  | 2.115088 |
| O | -2.601004 | 5.424158  | 1.071019 |
| O | -5.911362 | 2.162254  | 2.742008 |
| C | 3.992790  | -2.470211 | 2.077901 |
| N | 4.039245  | -3.496506 | 1.253482 |
| N | 4.173155  | -1.269695 | 1.452361 |
| C | -1.512424 | 0.605949  | 3.791426 |
| C | -0.496316 | -0.050641 | 3.154891 |
| C | 0.568211  | -0.625724 | 3.936442 |
| C | 0.510127  | -0.530471 | 5.371345 |
| C | -0.572043 | 0.179569  | 5.980524 |
| C | -1.545312 | 0.742067  | 5.211341 |
| C | 1.653647  | -1.287914 | 3.353326 |
| C | 1.492506  | -1.154450 | 6.141685 |
| C | 2.558852  | -1.841447 | 5.556991 |
| C | 2.665399  | -1.866658 | 4.127655 |
| C | 3.794397  | -2.534164 | 3.537893 |
| C | 4.690816  | -3.206456 | 4.321638 |
| C | 4.549361  | -3.223694 | 5.738610 |
| C | 3.530456  | -2.542557 | 6.337494 |
| H | 1.703927  | -1.397848 | 2.274128 |
| H | -2.324303 | 0.997592  | 3.183397 |
| H | -0.599020 | 0.254779  | 7.063850 |
| H | -2.364648 | 1.282290  | 5.676961 |
| H | 1.417797  | -1.116911 | 7.226156 |

|   |           |           |           |
|---|-----------|-----------|-----------|
| H | 5.523512  | -3.719096 | 3.850587  |
| H | 5.273582  | -3.765522 | 6.337224  |
| H | 3.431206  | -2.529302 | 7.419157  |
| C | -0.584911 | -0.229874 | 1.629453  |
| H | -0.276141 | -1.264404 | 1.377553  |
| O | -1.700801 | 0.175990  | 1.083061  |
| C | -3.114474 | 1.383042  | -5.462345 |
| H | -4.113134 | 1.706787  | -5.161295 |
| C | -3.077509 | 1.327812  | -6.991287 |
| H | -3.314585 | 2.311161  | -7.404386 |
| H | -2.100612 | 1.033892  | -7.385027 |
| C | -2.879741 | 0.028795  | -4.803683 |
| C | -3.506729 | -0.241001 | -3.583553 |
| C | -3.330221 | -1.449040 | -2.925922 |
| H | -3.878057 | -1.672240 | -2.020367 |
| C | -2.507070 | -2.414924 | -3.488385 |
| C | -1.875609 | -2.208381 | -4.718836 |
| C | -2.073873 | -0.973055 | -5.344647 |
| H | -1.600052 | -0.797119 | -6.306313 |
| C | -1.039181 | -3.317174 | -5.339281 |
| H | -1.435778 | -4.254859 | -4.942618 |
| C | -1.156950 | -3.368180 | -6.866149 |
| H | -2.207108 | -3.437024 | -7.161163 |
| H | -0.730305 | -2.487208 | -7.353561 |
| C | 0.414580  | -3.248607 | -4.891235 |
| C | 0.878848  | -4.067687 | -3.859673 |
| C | 2.218508  | -4.094491 | -3.512719 |
| H | 2.563628  | -4.795046 | -2.765168 |
| C | 3.107283  | -3.203195 | -4.096268 |
| C | 2.682595  | -2.310148 | -5.082828 |
| C | 1.341013  | -2.382190 | -5.472294 |
| H | 0.990765  | -1.697543 | -6.241502 |
| C | 3.630765  | -1.275785 | -5.675540 |
| H | 4.642176  | -1.604030 | -5.424992 |
| C | 3.526109  | -1.191715 | -7.200379 |
| H | 2.528874  | -0.903266 | -7.543100 |
| H | 4.236219  | -0.456674 | -7.587859 |
| C | 3.432832  | 0.070695  | -4.988420 |
| C | 4.128610  | 0.344784  | -3.807802 |
| C | 4.013432  | 1.567498  | -3.161541 |
| H | 4.646301  | 1.808410  | -2.317662 |
| C | 3.140993  | 2.522694  | -3.663006 |
| C | 2.421569  | 2.302790  | -4.840749 |
| C | 2.589277  | 1.069665  | -5.477033 |

|   |           |           |           |
|---|-----------|-----------|-----------|
| H | 2.054293  | 0.889726  | -6.405064 |
| C | 1.545192  | 3.411930  | -5.399114 |
| H | 1.972783  | 4.349293  | -5.036501 |
| C | 1.545743  | 3.460167  | -6.930387 |
| H | 2.569491  | 3.535664  | -7.305980 |
| H | 1.087432  | 2.577022  | -7.383344 |
| C | 0.135750  | 3.337190  | -4.833145 |
| C | -0.259525 | 4.156804  | -3.774563 |
| C | -1.562153 | 4.143860  | -3.300007 |
| H | -1.861045 | 4.804669  | -2.495055 |
| C | -2.490251 | 3.269770  | -3.851898 |
| C | -2.135385 | 2.399498  | -4.888194 |
| C | -0.818825 | 2.461844  | -5.347921 |
| H | -0.518562 | 1.784336  | -6.143460 |
| C | -3.937298 | 2.763125  | -2.094831 |
| C | -3.901911 | 3.566671  | -0.964981 |
| H | -3.760402 | 4.636246  | -1.060928 |
| C | -4.068122 | 3.001059  | 0.303087  |
| C | -4.245011 | 1.617738  | 0.423406  |
| C | -4.316848 | 0.826249  | -0.720557 |
| H | -4.506561 | -0.233575 | -0.601300 |
| C | -4.186766 | 1.391953  | -1.974284 |
| C | -1.611718 | -3.770695 | -1.766584 |
| C | -2.054865 | -3.388515 | -0.505429 |
| H | -3.035512 | -2.951791 | -0.376667 |
| C | -1.252585 | -3.579767 | 0.626080  |
| C | 0.031088  | -4.144337 | 0.464179  |
| C | 0.441443  | -4.554312 | -0.805134 |
| H | 1.403741  | -5.043317 | -0.913006 |
| C | -0.368554 | -4.388653 | -1.918981 |
| C | 4.507362  | -2.699752 | -2.352199 |
| C | 4.346350  | -3.530669 | -1.258722 |
| H | 4.267106  | -4.604108 | -1.386752 |
| C | 4.262596  | -2.933925 | 0.005341  |
| C | 4.353188  | -1.536126 | 0.118744  |
| C | 4.609039  | -0.695977 | -0.962474 |
| H | 4.729586  | 0.370542  | -0.827484 |
| C | 4.691521  | -1.302307 | -2.201775 |
| C | 2.368742  | 3.937581  | -1.904955 |
| C | 1.150064  | 4.627181  | -1.976758 |
| C | 0.481631  | 4.957242  | -0.811435 |
| H | -0.443926 | 5.521007  | -0.859629 |
| C | 0.995169  | 4.611670  | 0.439600  |
| C | 2.186059  | 3.876589  | 0.512207  |

|                           |           |           |           |
|---------------------------|-----------|-----------|-----------|
| C                         | 2.872190  | 3.561484  | -0.666278 |
| H                         | 3.825361  | 3.050775  | -0.599008 |
| O                         | -3.789685 | 3.297575  | -3.362486 |
| O                         | -4.424141 | 0.679006  | -3.124755 |
| O                         | -2.421375 | -3.656420 | -2.875584 |
| O                         | 0.000100  | -4.880296 | -3.158388 |
| O                         | 4.425437  | -3.198473 | -3.642101 |
| O                         | 5.019483  | -0.600340 | -3.338216 |
| O                         | 3.096949  | 3.770335  | -3.061311 |
| O                         | 0.661196  | 5.028832  | -3.200307 |
| H                         | -3.812800 | 0.607491  | -7.359059 |
| H                         | 0.982178  | 4.331659  | -7.271862 |
| H                         | 3.754140  | -2.165004 | -7.641221 |
| H                         | -0.626317 | -4.242815 | -7.249942 |
| H                         | 4.075779  | -0.330750 | 1.839826  |
| H                         | 1.973313  | 0.686345  | -0.606068 |
| C                         | 1.142328  | 0.048186  | -0.278350 |
| H                         | 1.553007  | -0.945171 | -0.048384 |
| N                         | 0.643617  | 0.609652  | 1.006342  |
| C                         | 0.084307  | -0.051610 | -1.370523 |
| H                         | -0.727517 | -0.705614 | -1.027339 |
| C                         | 0.755383  | -0.655733 | -2.600904 |
| H                         | 0.033505  | -0.752057 | -3.417307 |
| H                         | 1.564285  | -0.000376 | -2.948401 |
| H                         | 1.181710  | -1.647072 | -2.398741 |
| C                         | -0.494843 | 1.315586  | -1.716625 |
| H                         | -1.164829 | 1.221623  | -2.577126 |
| H                         | -1.063609 | 1.763686  | -0.896387 |
| H                         | 0.312051  | 2.003015  | -2.004556 |
| H                         | 1.450107  | 0.688386  | 1.632303  |
| H                         | 0.250219  | 1.563223  | 0.891125  |
| O                         | -1.237456 | 2.681337  | 1.304542  |
| H                         | -1.192937 | 2.838892  | 2.254560  |
| H                         | -1.631301 | 1.748366  | 1.208269  |
| <b>TS<sub>1-H2O</sub></b> |           |           |           |
| C                         | -2.594308 | -2.620786 | 2.437556  |
| C                         | -2.800631 | -2.708630 | 3.937156  |
| H                         | -2.719006 | -1.705720 | 4.364410  |
| H                         | -3.811768 | -3.077533 | 4.125884  |
| H                         | -2.080358 | -3.366597 | 4.427118  |
| C                         | 0.865239  | -5.142408 | 2.709996  |
| C                         | 2.111579  | -5.526460 | 3.470871  |
| H                         | 2.035198  | -6.589857 | 3.706545  |

|   |           |           |          |
|---|-----------|-----------|----------|
| H | 3.031023  | -5.325070 | 2.919598 |
| H | 2.126790  | -4.976678 | 4.416570 |
| N | 1.072561  | -4.486209 | 1.532815 |
| H | 2.049419  | -4.346577 | 1.275284 |
| N | -1.527735 | -3.345809 | 1.998239 |
| H | -1.133167 | -4.008189 | 2.671782 |
| O | -3.329592 | -1.949472 | 1.720995 |
| O | -0.250256 | -5.410987 | 3.149458 |
| C | 3.302592  | 2.498395  | 2.141377 |
| C | 3.792341  | 2.474170  | 3.570692 |
| H | 4.855240  | 2.221662  | 3.572832 |
| H | 3.643303  | 3.422348  | 4.088755 |
| H | 3.261477  | 1.678627  | 4.101159 |
| C | 0.794432  | 5.808103  | 2.576789 |
| C | -0.275823 | 6.376956  | 3.478820 |
| H | -1.205111 | 6.556605  | 2.935663 |
| H | -0.464329 | 5.675235  | 4.297436 |
| H | 0.102432  | 7.302681  | 3.911903 |
| N | 0.325435  | 5.137884  | 1.496526 |
| H | -0.686759 | 5.122385  | 1.343855 |
| N | 2.807421  | 3.671538  | 1.721347 |
| H | 2.759887  | 4.470664  | 2.368226 |
| O | 3.353785  | 1.474252  | 1.440805 |
| O | 1.990372  | 5.939414  | 2.843983 |
| C | -3.386192 | 4.832947  | 1.840610 |
| C | -3.715016 | 5.382515  | 3.217052 |
| H | -2.914134 | 5.109352  | 3.910383 |
| H | -3.755830 | 6.471131  | 3.160414 |
| H | -4.657495 | 4.996320  | 3.609373 |
| C | -5.228631 | 1.141424  | 2.732891 |
| C | -5.251511 | 0.065807  | 3.795603 |
| H | -4.880962 | -0.887140 | 3.415153 |
| H | -4.632464 | 0.381345  | 4.641035 |
| H | -6.276296 | -0.036107 | 4.154663 |
| N | -4.434550 | 0.864606  | 1.674096 |
| H | -3.907673 | -0.012428 | 1.680961 |
| N | -4.067675 | 3.709179  | 1.538294 |
| H | -4.784536 | 3.382871  | 2.196005 |
| O | -2.554715 | 5.379433  | 1.114340 |
| O | -5.872323 | 2.185115  | 2.860881 |
| C | 3.853247  | -2.462354 | 2.060255 |
| N | 3.967921  | -3.486779 | 1.239978 |
| N | 4.019968  | -1.257159 | 1.439170 |
| C | -1.632894 | 0.708941  | 3.726598 |

|   |           |           |           |
|---|-----------|-----------|-----------|
| C | -0.642963 | 0.006934  | 3.097933  |
| C | 0.365617  | -0.657549 | 3.883497  |
| C | 0.267857  | -0.612503 | 5.318159  |
| C | -0.799064 | 0.123988  | 5.923285  |
| C | -1.707270 | 0.781547  | 5.149595  |
| C | 1.448683  | -1.328781 | 3.304909  |
| C | 1.212881  | -1.287591 | 6.091423  |
| C | 2.294170  | -1.955525 | 5.512464  |
| C | 2.440608  | -1.933459 | 4.085925  |
| C | 3.602780  | -2.556539 | 3.510952  |
| C | 4.495187  | -3.225404 | 4.303507  |
| C | 4.311172  | -3.295720 | 5.713324  |
| C | 3.254124  | -2.664078 | 6.300246  |
| H | 1.523691  | -1.407019 | 2.223757  |
| H | -2.385406 | 1.197438  | 3.113756  |
| H | -0.857497 | 0.156110  | 7.007517  |
| H | -2.503261 | 1.357644  | 5.612171  |
| H | 1.109287  | -1.286894 | 7.174108  |
| H | 5.356725  | -3.698525 | 3.842901  |
| H | 5.031954  | -3.836961 | 6.316605  |
| H | 3.120565  | -2.688297 | 7.378032  |
| C | -0.654597 | -0.084557 | 1.571444  |
| H | -0.475025 | -1.130238 | 1.272881  |
| O | -1.766756 | 0.419499  | 1.000932  |
| C | -3.116593 | 1.388514  | -5.433934 |
| H | -4.109629 | 1.719154  | -5.122359 |
| C | -3.100373 | 1.321595  | -6.962803 |
| H | -3.334181 | 2.303855  | -7.380372 |
| H | -2.131660 | 1.015789  | -7.367508 |
| C | -2.878291 | 0.038088  | -4.768208 |
| C | -3.503343 | -0.229914 | -3.547331 |
| C | -3.295675 | -1.423026 | -2.869874 |
| H | -3.827041 | -1.640627 | -1.953060 |
| C | -2.461094 | -2.383754 | -3.424012 |
| C | -1.850907 | -2.188454 | -4.667649 |
| C | -2.063896 | -0.960871 | -5.302790 |
| H | -1.598247 | -0.789869 | -6.269265 |
| C | -1.029908 | -3.305174 | -5.295030 |
| H | -1.429799 | -4.238839 | -4.892104 |
| C | -1.165956 | -3.358542 | -6.820364 |
| H | -2.220016 | -3.415716 | -7.103802 |
| H | -0.733904 | -2.484095 | -7.314697 |
| C | 0.428995  | -3.248098 | -4.865306 |
| C | 0.902746  | -4.075984 | -3.845678 |

|   |           |           |           |
|---|-----------|-----------|-----------|
| C | 2.244823  | -4.102017 | -3.508032 |
| H | 2.595836  | -4.803053 | -2.763878 |
| C | 3.127985  | -3.205195 | -4.092126 |
| C | 2.694979  | -2.309979 | -5.072863 |
| C | 1.350345  | -2.379666 | -5.450781 |
| H | 0.993108  | -1.688815 | -6.211256 |
| C | 3.636607  | -1.275450 | -5.673858 |
| H | 4.650070  | -1.596206 | -5.421689 |
| C | 3.529405  | -1.205877 | -7.199404 |
| H | 2.529211  | -0.928628 | -7.542878 |
| H | 4.233122  | -0.468711 | -7.594474 |
| C | 3.433616  | 0.076104  | -4.999234 |
| C | 4.127750  | 0.360927  | -3.820110 |
| C | 4.023794  | 1.594630  | -3.194590 |
| H | 4.659081  | 1.840969  | -2.353810 |
| C | 3.160015  | 2.549213  | -3.712491 |
| C | 2.430587  | 2.313831  | -4.881369 |
| C | 2.591433  | 1.070344  | -5.499477 |
| H | 2.053246  | 0.878469  | -6.423294 |
| C | 1.549501  | 3.415366  | -5.450510 |
| H | 1.980238  | 4.357596  | -5.104662 |
| C | 1.539394  | 3.440703  | -6.982135 |
| H | 2.560219  | 3.515114  | -7.365826 |
| H | 1.082588  | 2.548840  | -7.419297 |
| C | 0.144264  | 3.349173  | -4.870888 |
| C | -0.234126 | 4.173330  | -3.809806 |
| C | -1.525400 | 4.152522  | -3.304439 |
| H | -1.809224 | 4.813034  | -2.493995 |
| C | -2.459303 | 3.268972  | -3.829993 |
| C | -2.125530 | 2.405518  | -4.879779 |
| C | -0.819147 | 2.472117  | -5.367179 |
| H | -0.533754 | 1.796015  | -6.169269 |
| C | -3.898170 | 2.740874  | -2.048616 |
| C | -3.826781 | 3.523420  | -0.904939 |
| H | -3.620328 | 4.583645  | -0.979001 |
| C | -4.034769 | 2.949048  | 0.354627  |
| C | -4.314099 | 1.580403  | 0.453615  |
| C | -4.415978 | 0.814618  | -0.703829 |
| H | -4.682761 | -0.231272 | -0.613068 |
| C | -4.217376 | 1.382756  | -1.946456 |
| C | -1.527711 | -3.755044 | -1.710974 |
| C | -1.933883 | -3.373710 | -0.435753 |
| H | -2.893019 | -2.896586 | -0.287118 |
| C | -1.124753 | -3.625172 | 0.680550  |



|   |           |           |           |
|---|-----------|-----------|-----------|
| C | 0.126569  | -4.247966 | 0.491435  |
| C | 0.503257  | -4.646678 | -0.791464 |
| H | 1.439012  | -5.179452 | -0.922299 |
| C | -0.311864 | -4.419889 | -1.890832 |
| C | 4.513688  | -2.687454 | -2.349558 |
| C | 4.351564  | -3.518899 | -1.257843 |
| H | 4.296702  | -4.593974 | -1.384513 |
| C | 4.218087  | -2.920065 | 0.000432  |
| C | 4.260859  | -1.520231 | 0.112600  |
| C | 4.524758  | -0.676339 | -0.965333 |
| H | 4.604946  | 0.394724  | -0.832733 |
| C | 4.661833  | -1.285392 | -2.199245 |
| C | 2.417253  | 3.993086  | -1.969899 |
| C | 1.197047  | 4.679141  | -2.039191 |
| C | 0.543229  | 5.030439  | -0.872885 |
| H | -0.381486 | 5.595100  | -0.920615 |
| C | 1.069314  | 4.700973  | 0.376228  |
| C | 2.259614  | 3.967516  | 0.447774  |
| C | 2.935632  | 3.637693  | -0.731481 |
| H | 3.892751  | 3.133881  | -0.666245 |
| O | -3.746844 | 3.287263  | -3.310767 |
| O | -4.444109 | 0.674984  | -3.102409 |
| O | -2.358841 | -3.618935 | -2.800655 |
| O | 0.028835  | -4.895464 | -3.143669 |
| O | 4.447321  | -3.191615 | -3.638937 |
| O | 5.007453  | -0.585069 | -3.331684 |
| O | 3.130005  | 3.806925  | -3.133340 |
| O | 0.692816  | 5.056478  | -3.264554 |
| H | -3.846843 | 0.605057  | -7.315173 |
| H | 0.969663  | 4.304533  | -7.332789 |
| H | 3.764605  | -2.181300 | -7.631709 |
| H | -0.649857 | -4.240378 | -7.207407 |
| H | 3.911540  | -0.318161 | 1.825385  |
| H | 1.932248  | 0.800485  | -0.539620 |
| C | 1.106897  | 0.146282  | -0.234437 |
| H | 1.532879  | -0.838316 | 0.008502  |
| N | 0.557974  | 0.706401  | 1.029905  |
| C | 0.092469  | 0.007857  | -1.361680 |
| H | -0.749078 | -0.609610 | -1.020607 |
| C | 0.792355  | -0.685785 | -2.528021 |
| H | 0.100085  | -0.799651 | -3.367197 |
| H | 1.637542  | -0.077765 | -2.874838 |
| H | 1.174895  | -1.679308 | -2.257578 |
| C | -0.438558 | 1.362761  | -1.813545 |

|   |           |          |           |
|---|-----------|----------|-----------|
| H | -1.126822 | 1.219835 | -2.652024 |
| H | -0.964833 | 1.911501 | -1.026860 |
| H | 0.393497  | 1.982290 | -2.174760 |
| H | 1.331295  | 0.753086 | 1.697375  |
| H | 0.109482  | 1.725321 | 0.962342  |
| O | -1.036731 | 2.681227 | 1.140353  |
| H | -1.049140 | 3.008488 | 2.047642  |
| H | -1.609780 | 1.587195 | 1.075797  |

**2·H<sub>2</sub>O**

|   |           |           |          |
|---|-----------|-----------|----------|
| C | -2.892233 | -2.755362 | 2.339981 |
| C | -3.083708 | -2.777184 | 3.844541 |
| H | -2.902256 | -1.772631 | 4.236624 |
| H | -4.118059 | -3.049736 | 4.062197 |
| H | -2.410821 | -3.475774 | 4.345461 |
| C | 0.730649  | -5.048112 | 2.751768 |
| C | 1.982912  | -5.387287 | 3.523465 |
| H | 1.905181  | -6.435084 | 3.819924 |
| H | 2.897300  | -5.221435 | 2.952180 |
| H | 2.009892  | -4.785524 | 4.437032 |
| N | 0.922362  | -4.402706 | 1.562850 |
| H | 1.896793  | -4.259763 | 1.300856 |
| N | -1.768797 | -3.411575 | 1.941818 |
| H | -1.329691 | -4.006286 | 2.650130 |
| O | -3.688150 | -2.187277 | 1.596394 |
| O | -0.379288 | -5.338997 | 3.189791 |
| C | 3.264695  | 2.324233  | 2.118438 |
| C | 3.683206  | 2.265332  | 3.570110 |
| H | 4.753613  | 2.052744  | 3.618209 |
| H | 3.470459  | 3.185555  | 4.115868 |
| H | 3.156767  | 1.430268  | 4.042760 |
| C | 0.769871  | 5.720365  | 2.553355 |
| C | -0.293605 | 6.350862  | 3.422814 |
| H | -1.225815 | 6.507759  | 2.877688 |
| H | -0.479804 | 5.705442  | 4.286802 |
| H | 0.093978  | 7.298913  | 3.796030 |
| N | 0.294638  | 5.055930  | 1.470270 |
| H | -0.714756 | 5.084387  | 1.305214 |
| N | 2.703141  | 3.482626  | 1.728861 |
| H | 2.641653  | 4.265222  | 2.391311 |
| O | 3.420073  | 1.343292  | 1.379239 |
| O | 1.962519  | 5.796608  | 2.848638 |
| C | -3.408746 | 4.716460  | 1.771207 |
| C | -3.741655 | 5.291289  | 3.136008 |

|   |           |           |           |
|---|-----------|-----------|-----------|
| H | -2.931727 | 5.051605  | 3.831213  |
| H | -3.803877 | 6.377216  | 3.052854  |
| H | -4.674569 | 4.897182  | 3.542966  |
| C | -5.279804 | 1.012572  | 2.695218  |
| C | -5.371862 | -0.074833 | 3.740529  |
| H | -5.251592 | -1.063539 | 3.294360  |
| H | -4.580096 | 0.069221  | 4.483795  |
| H | -6.334585 | 0.012249  | 4.242767  |
| N | -4.459735 | 0.716765  | 1.653790  |
| H | -4.057984 | -0.224953 | 1.635937  |
| N | -4.070975 | 3.572265  | 1.496867  |
| H | -4.785160 | 3.254429  | 2.160765  |
| O | -2.589429 | 5.261312  | 1.030473  |
| O | -5.880910 | 2.079168  | 2.819017  |
| C | 3.942373  | -2.552697 | 2.110943  |
| N | 3.999084  | -3.591717 | 1.302003  |
| N | 4.124410  | -1.361621 | 1.469486  |
| C | -1.576418 | 0.528221  | 3.707713  |
| C | -0.551331 | -0.145560 | 3.104082  |
| C | 0.492151  | -0.717663 | 3.915315  |
| C | 0.402107  | -0.620423 | 5.346006  |
| C | -0.692863 | 0.095959  | 5.924658  |
| C | -1.639783 | 0.665953  | 5.128110  |
| C | 1.588983  | -1.375429 | 3.350788  |
| C | 1.371404  | -1.241533 | 6.136289  |
| C | 2.452806  | -1.922465 | 5.571497  |
| C | 2.587397  | -1.947557 | 4.144206  |
| C | 3.730964  | -2.604511 | 3.570927  |
| C | 4.620728  | -3.266370 | 4.370713  |
| C | 4.454682  | -3.283127 | 5.785501  |
| C | 3.417973  | -2.614525 | 6.368141  |
| H | 1.669210  | -1.462949 | 2.271805  |
| H | -2.372436 | 0.942599  | 3.094778  |
| H | -0.748740 | 0.175887  | 7.006540  |
| H | -2.464321 | 1.217732  | 5.570445  |
| H | 1.276883  | -1.202466 | 7.219115  |
| H | 5.465481  | -3.773322 | 3.915264  |
| H | 5.174519  | -3.816875 | 6.396670  |
| H | 3.301001  | -2.603641 | 7.448057  |
| C | -0.519706 | -0.346533 | 1.593964  |
| H | -0.326826 | -1.413177 | 1.400663  |
| O | -1.759841 | -0.084858 | 1.003542  |
| C | -3.111579 | 1.225267  | -5.454448 |
| H | -4.103545 | 1.563589  | -5.147615 |

|   |           |           |           |
|---|-----------|-----------|-----------|
| C | -3.088769 | 1.159511  | -6.983470 |
| H | -3.314753 | 2.143474  | -7.401373 |
| H | -2.119921 | 0.848234  | -7.383452 |
| C | -2.888722 | -0.128064 | -4.791083 |
| C | -3.535657 | -0.403675 | -3.583529 |
| C | -3.364682 | -1.612291 | -2.926360 |
| H | -3.921423 | -1.837556 | -2.026518 |
| C | -2.530186 | -2.574662 | -3.477758 |
| C | -1.877246 | -2.362626 | -4.695912 |
| C | -2.068578 | -1.125428 | -5.319488 |
| H | -1.576162 | -0.943342 | -6.270619 |
| C | -1.034673 | -3.469599 | -5.312600 |
| H | -1.431695 | -4.407236 | -4.916177 |
| C | -1.151619 | -3.521675 | -6.839615 |
| H | -2.201329 | -3.595621 | -7.134977 |
| H | -0.729340 | -2.638788 | -7.327296 |
| C | 0.418708  | -3.402389 | -4.862831 |
| C | 0.874491  | -4.211047 | -3.819447 |
| C | 2.212066  | -4.242717 | -3.466357 |
| H | 2.549782  | -4.935289 | -2.708046 |
| C | 3.109430  | -3.365028 | -4.057902 |
| C | 2.694391  | -2.484403 | -5.059604 |
| C | 1.353953  | -2.552910 | -5.453978 |
| H | 1.012449  | -1.876575 | -6.234298 |
| C | 3.650184  | -1.462633 | -5.661427 |
| H | 4.658661  | -1.790733 | -5.399042 |
| C | 3.555889  | -1.400801 | -7.188036 |
| H | 2.561673  | -1.114645 | -7.541507 |
| H | 4.270360  | -0.673110 | -7.581348 |
| C | 3.451461  | -0.105700 | -4.995278 |
| C | 4.140248  | 0.182742  | -3.814168 |
| C | 4.025490  | 1.415467  | -3.187354 |
| H | 4.652157  | 1.665975  | -2.341687 |
| C | 3.154228  | 2.362644  | -3.704969 |
| C | 2.438307  | 2.127274  | -4.882149 |
| C | 2.610191  | 0.886459  | -5.501898 |
| H | 2.079242  | 0.693168  | -6.429628 |
| C | 1.562029  | 3.229801  | -5.456324 |
| H | 1.995415  | 4.171934  | -5.113336 |
| C | 1.553727  | 3.250403  | -6.988027 |
| H | 2.575400  | 3.319933  | -7.370335 |
| H | 1.094709  | 2.358633  | -7.423023 |
| C | 0.155998  | 3.170476  | -4.878943 |
| C | -0.227785 | 4.004840  | -3.827862 |

|   |           |           |           |
|---|-----------|-----------|-----------|
| C | -1.521144 | 3.986769  | -3.326218 |
| H | -1.806959 | 4.653980  | -2.521883 |
| C | -2.452874 | 3.101735  | -3.851660 |
| C | -2.116365 | 2.233997  | -4.896093 |
| C | -0.806956 | 2.292273  | -5.374945 |
| H | -0.518742 | 1.610471  | -6.171159 |
| C | -3.899814 | 2.574105  | -2.080353 |
| C | -3.826151 | 3.359716  | -0.939242 |
| H | -3.618777 | 4.419185  | -1.019054 |
| C | -4.039870 | 2.796347  | 0.324074  |
| C | -4.314902 | 1.424395  | 0.428522  |
| C | -4.411570 | 0.651794  | -0.727908 |
| H | -4.671754 | -0.395805 | -0.631689 |
| C | -4.220868 | 1.216292  | -1.975261 |
| C | -1.650390 | -3.919838 | -1.747030 |
| C | -2.111624 | -3.541667 | -0.491499 |
| H | -3.102001 | -3.124089 | -0.374546 |
| C | -1.314554 | -3.710305 | 0.646210  |
| C | -0.019815 | -4.252123 | 0.499326  |
| C | 0.408672  | -4.660369 | -0.764454 |
| H | 1.381403  | -5.130309 | -0.862094 |
| C | -0.394946 | -4.515422 | -1.885837 |
| C | 4.497640  | -2.844092 | -2.310514 |
| C | 4.328347  | -3.660605 | -1.207632 |
| H | 4.251787  | -4.735825 | -1.322361 |
| C | 4.231588  | -3.046675 | 0.047601  |
| C | 4.315556  | -1.647269 | 0.141606  |
| C | 4.579708  | -0.821045 | -0.948601 |
| H | 4.690498  | 0.247966  | -0.825675 |
| C | 4.678549  | -1.444297 | -2.177924 |
| C | 2.384518  | 3.815513  | -1.969424 |
| C | 1.185234  | 4.534919  | -2.056287 |
| C | 0.534966  | 4.923134  | -0.899064 |
| H | -0.369368 | 5.518712  | -0.963473 |
| C | 1.038176  | 4.587608  | 0.357993  |
| C | 2.197302  | 3.804546  | 0.447286  |
| C | 2.875321  | 3.446670  | -0.723582 |
| H | 3.807926  | 2.901801  | -0.646242 |
| O | -3.744544 | 3.121117  | -3.339629 |
| O | -4.464370 | 0.511031  | -3.128042 |
| O | -2.451528 | -3.816301 | -2.863120 |
| O | -0.013120 | -5.013574 | -3.117151 |
| O | 4.424237  | -3.360508 | -3.595121 |
| O | 5.020943  | -0.759900 | -3.321927 |

|   |           |           |           |
|---|-----------|-----------|-----------|
| O | 3.107332  | 3.619038  | -3.123944 |
| O | 0.691932  | 4.900209  | -3.289621 |
| H | -3.837715 | 0.447547  | -7.339692 |
| H | 0.987581  | 4.115110  | -7.342387 |
| H | 3.784343  | -2.380932 | -7.613324 |
| H | -0.616554 | -4.393875 | -7.222844 |
| H | 4.012468  | -0.414505 | 1.834164  |
| H | 1.935231  | 0.506472  | -0.542946 |
| C | 1.087299  | -0.122898 | -0.242629 |
| H | 1.488763  | -1.135855 | -0.038196 |
| N | 0.532907  | 0.470172  | 0.980812  |
| C | 0.093269  | -0.216491 | -1.398122 |
| H | -0.713822 | -0.910255 | -1.122428 |
| C | 0.825998  | -0.765805 | -2.617326 |
| H | 0.136808  | -0.881444 | -3.459456 |
| H | 1.613022  | -0.066769 | -2.926164 |
| H | 1.293632  | -1.739153 | -2.417333 |
| C | -0.516791 | 1.139964  | -1.734971 |
| H | -1.074554 | 1.072552  | -2.674876 |
| H | -1.202885 | 1.509277  | -0.967792 |
| H | 0.275490  | 1.888980  | -1.870182 |
| H | 1.303454  | 0.615752  | 1.628694  |
| H | -0.367560 | 2.099634  | 0.969132  |
| O | -1.162957 | 2.620997  | 1.239920  |
| H | -0.991670 | 2.832294  | 2.165572  |
| H | -1.870668 | 0.885990  | 0.998497  |

**1'**

|   |           |           |          |
|---|-----------|-----------|----------|
| C | -1.191953 | -0.254632 | 0.000000 |
| C | 0.062219  | -0.863628 | 0.000000 |
| C | 1.224173  | -0.087203 | 0.000000 |
| C | 1.125225  | 1.296966  | 0.000000 |
| C | -0.131250 | 1.905501  | 0.000000 |
| C | -1.290257 | 1.133003  | 0.000000 |
| H | -2.087962 | -0.870963 | 0.000000 |
| H | -0.205715 | 2.988450  | 0.000000 |
| H | -2.263959 | 1.611590  | 0.000000 |
| C | 0.161379  | -2.343214 | 0.000000 |
| H | -0.813215 | -2.876681 | 0.000000 |
| O | 1.204102  | -2.953498 | 0.000000 |
| H | 2.184883  | -0.592785 | 0.000000 |
| H | 2.022430  | 1.907194  | 0.000000 |

**2'**

|   |           |           |           |
|---|-----------|-----------|-----------|
| H | 1.350300  | -0.256100 | -0.239400 |
| C | 0.825900  | -0.151400 | 0.720200  |
| H | 1.081700  | -1.041400 | 1.308000  |
| N | 1.377900  | 1.011400  | 1.405200  |
| C | -0.686900 | -0.150900 | 0.454100  |
| H | -1.195400 | -0.072700 | 1.427000  |
| C | -1.102500 | -1.465000 | -0.204700 |
| H | -2.183700 | -1.506400 | -0.364500 |
| H | -0.617300 | -1.573000 | -1.181800 |
| H | -0.816700 | -2.326100 | 0.407100  |
| C | -1.104100 | 1.042100  | -0.403900 |
| H | -2.181400 | 1.037200  | -0.592400 |
| H | -0.857100 | 1.992900  | 0.077400  |
| H | -0.594400 | 1.009900  | -1.374500 |
| H | 1.254600  | 1.844700  | 0.838300  |
| H | 0.872500  | 1.173700  | 2.272200  |

**3'**

|   |           |           |           |
|---|-----------|-----------|-----------|
| C | -2.266092 | 0.700286  | 3.390682  |
| C | -1.514458 | -0.438876 | 3.099193  |
| C | -0.518243 | -0.866577 | 3.975895  |
| C | -0.270554 | -0.158401 | 5.146453  |
| C | -1.022455 | 0.978816  | 5.437605  |
| C | -2.019239 | 1.407956  | 4.561372  |
| H | 0.066040  | -1.748221 | 3.724050  |
| H | 0.504647  | -0.487641 | 5.830807  |
| H | -3.035458 | 1.006887  | 2.688379  |
| H | -0.831164 | 1.532714  | 6.351428  |
| H | -2.602001 | 2.292901  | 4.796022  |
| C | -1.768792 | -1.198864 | 1.845886  |
| H | -1.172939 | -2.123513 | 1.729475  |
| O | -2.575402 | -0.856843 | 1.010707  |
| H | 1.869967  | 0.294547  | -0.760086 |
| C | 1.192432  | -0.486256 | -0.369645 |
| H | 1.738715  | -1.435121 | -0.426368 |
| N | 0.808265  | -0.278356 | 1.027199  |
| C | -0.032056 | -0.563789 | -1.281646 |
| H | -0.671324 | -1.374382 | -0.909177 |
| C | 0.405687  | -0.882832 | -2.710110 |
| H | -0.459042 | -0.981924 | -3.372025 |
| H | 1.039624  | -0.081731 | -3.108158 |
| H | 0.975847  | -1.816114 | -2.756434 |
| C | -0.842920 | 0.731069  | -1.239240 |
| H | -1.686308 | 0.679267  | -1.933573 |

|   |           |           |           |
|---|-----------|-----------|-----------|
| H | -1.261773 | 0.914468  | -0.246134 |
| H | -0.219627 | 1.586509  | -1.529174 |
| H | 1.626856  | -0.321419 | 1.627548  |
| H | 0.425966  | 0.656337  | 1.148369  |

**TS<sub>1</sub>'**

|   |           |           |           |
|---|-----------|-----------|-----------|
| C | -2.270567 | 0.716405  | 3.454882  |
| C | -1.498715 | -0.375499 | 3.069796  |
| C | -0.487729 | -0.843127 | 3.910825  |
| C | -0.241092 | -0.213241 | 5.126548  |
| C | -1.012604 | 0.883829  | 5.508167  |
| C | -2.027883 | 1.344618  | 4.673914  |
| H | 0.102972  | -1.709327 | 3.615600  |
| H | 0.544448  | -0.579499 | 5.780247  |
| H | -3.057323 | 1.035782  | 2.778788  |
| H | -0.825323 | 1.372571  | 6.459188  |
| H | -2.633242 | 2.193669  | 4.976156  |
| C | -1.771633 | -1.019841 | 1.720337  |
| H | -1.688581 | -2.123030 | 1.809861  |
| O | -2.795751 | -0.530834 | 1.008158  |
| H | 0.716919  | -1.171114 | -0.763983 |
| C | -0.042147 | -1.633938 | -0.121878 |
| H | 0.465461  | -2.360490 | 0.524264  |
| N | -0.630934 | -0.580456 | 0.727054  |
| C | -1.084941 | -2.334173 | -0.997282 |
| H | -1.882248 | -2.716038 | -0.347935 |
| C | -0.411531 | -3.509273 | -1.706702 |
| H | -1.135437 | -4.055026 | -2.316771 |
| H | 0.384462  | -3.155900 | -2.372615 |
| H | 0.029842  | -4.213992 | -0.995335 |
| C | -1.718697 | -1.374622 | -2.004868 |
| H | -2.359517 | -1.927649 | -2.697158 |
| H | -2.343525 | -0.632482 | -1.503662 |
| H | -0.948735 | -0.865285 | -2.596822 |
| H | 0.072504  | 0.025253  | 1.150058  |
| H | -1.620354 | -0.092194 | 0.340268  |

**4'**

|   |           |           |          |
|---|-----------|-----------|----------|
| C | -2.127343 | 0.595276  | 3.686116 |
| C | -1.055105 | -0.043826 | 3.069758 |
| C | 0.047591  | -0.421893 | 3.841208 |
| C | 0.085578  | -0.149021 | 5.203919 |
| C | -0.983997 | 0.505717  | 5.811896 |
| C | -2.088985 | 0.873539  | 5.051045 |



|   |           |           |           |
|---|-----------|-----------|-----------|
| H | 0.879216  | -0.944358 | 3.371971  |
| H | 0.947069  | -0.448528 | 5.792394  |
| H | -2.992393 | 0.859372  | 3.088276  |
| H | -0.956758 | 0.721675  | 6.875105  |
| H | -2.928021 | 1.376391  | 5.521731  |
| C | -1.077462 | -0.356809 | 1.579388  |
| H | -1.076774 | -1.452958 | 1.452744  |
| O | -2.273479 | 0.071216  | 0.960644  |
| H | 1.592774  | -0.084411 | -0.448271 |
| C | 0.631626  | -0.539337 | -0.176300 |
| H | 0.839599  | -1.579776 | 0.132410  |
| N | 0.063650  | 0.239578  | 0.919672  |
| C | -0.265828 | -0.565166 | -1.417504 |
| H | -1.247183 | -0.950541 | -1.112809 |
| C | 0.330901  | -1.504469 | -2.463953 |
| H | -0.298040 | -1.545948 | -3.357553 |
| H | 1.323963  | -1.156731 | -2.772456 |
| H | 0.436206  | -2.522690 | -2.076889 |
| C | -0.454577 | 0.838695  | -1.986415 |
| H | -1.148080 | 0.830811  | -2.832108 |
| H | -0.839594 | 1.522165  | -1.226419 |
| H | 0.503298  | 1.238551  | -2.340458 |
| H | 0.770760  | 0.518756  | 1.587791  |
| H | -2.116911 | 0.996918  | 0.730368  |

**5'**

|   |           |           |           |
|---|-----------|-----------|-----------|
| C | -2.208531 | 0.430743  | 3.647601  |
| C | -1.039764 | -0.068943 | 3.072581  |
| C | 0.112841  | -0.177780 | 3.852999  |
| C | 0.097145  | 0.210146  | 5.189086  |
| C | -1.070171 | 0.712297  | 5.758619  |
| C | -2.221087 | 0.821790  | 4.983893  |
| H | 1.019628  | -0.559987 | 3.396526  |
| H | 1.000161  | 0.123995  | 5.785650  |
| H | -3.099709 | 0.516192  | 3.037371  |
| H | -1.081846 | 1.017617  | 6.800325  |
| H | -3.134395 | 1.215078  | 5.419609  |
| C | -1.021212 | -0.533482 | 1.624706  |
| H | -1.129020 | -1.630236 | 1.598022  |
| O | -2.147039 | 0.060395  | 0.983318  |
| H | 1.626213  | -0.644380 | -0.458301 |
| C | 0.580695  | -0.893793 | -0.232439 |
| H | 0.554112  | -1.978169 | -0.059639 |
| N | 0.248904  | -0.240570 | 1.022099  |

|           |           |           |           |
|-----------|-----------|-----------|-----------|
| C         | -0.255086 | -0.566968 | -1.485540 |
| H         | -1.256173 | -1.011323 | -1.371240 |
| C         | 0.393162  | -1.225340 | -2.702907 |
| H         | -0.209914 | -1.075996 | -3.602645 |
| H         | 1.382044  | -0.790089 | -2.886542 |
| H         | 0.523099  | -2.302133 | -2.555102 |
| C         | -0.403903 | 0.939319  | -1.684534 |
| H         | -0.935488 | 1.162188  | -2.614191 |
| H         | -0.954597 | 1.394452  | -0.857408 |
| H         | 0.584303  | 1.411654  | -1.746168 |
| H         | 0.399090  | 0.763551  | 0.990674  |
| H         | -2.324760 | -0.424928 | 0.171377  |
| <b>6'</b> |           |           |           |
| C         | 1.351408  | 0.914041  | 2.851318  |
| C         | 0.306128  | -0.009331 | 2.798827  |
| C         | -0.200815 | -0.530666 | 3.993133  |
| C         | 0.311577  | -0.112896 | 5.218995  |
| C         | 1.340989  | 0.824637  | 5.265554  |
| C         | 1.862475  | 1.331548  | 4.078548  |
| H         | -1.008668 | -1.254107 | 3.952682  |
| H         | -0.093257 | -0.522142 | 6.139441  |
| H         | 1.753272  | 1.299159  | 1.920013  |
| H         | 1.737836  | 1.152885  | 6.220819  |
| H         | 2.673124  | 2.053242  | 4.106225  |
| C         | -0.267074 | -0.457135 | 1.462410  |
| H         | 0.199625  | -1.407202 | 1.158115  |
| O         | -1.665159 | -0.742235 | 1.726645  |
| H         | 0.201861  | 0.915005  | -1.555459 |
| C         | -0.262094 | 0.138816  | -0.932725 |
| H         | 0.272598  | -0.796348 | -1.151388 |
| N         | -0.011242 | 0.498080  | 0.448660  |
| C         | -1.729375 | 0.003416  | -1.389013 |
| H         | -2.150715 | -0.930090 | -0.979494 |
| C         | -1.772312 | -0.125667 | -2.911125 |
| H         | -2.791881 | -0.298136 | -3.266232 |
| H         | -1.406094 | 0.795596  | -3.377810 |
| H         | -1.145629 | -0.952237 | -3.261232 |
| C         | -2.571705 | 1.182990  | -0.907713 |
| H         | -3.591934 | 1.121304  | -1.297192 |
| H         | -2.621907 | 1.226110  | 0.183677  |
| H         | -2.133756 | 2.127799  | -1.249652 |
| H         | -0.344775 | 1.432780  | 0.701320  |
| H         | -2.059696 | -1.088803 | 0.918345  |

|   |           |          |          |
|---|-----------|----------|----------|
| O | -0.844525 | 3.068560 | 1.606766 |
| H | -0.097810 | 3.154958 | 2.209766 |
| H | -1.548093 | 2.667459 | 2.156850 |
| O | -2.541914 | 1.513966 | 3.131987 |
| H | -2.409287 | 0.685274 | 2.635678 |
| H | -2.046831 | 1.369543 | 3.947032 |

**TS<sub>2</sub>'**

|   |           |           |           |
|---|-----------|-----------|-----------|
| C | 1.331491  | 0.998000  | 2.954227  |
| C | 0.415261  | -0.042016 | 2.776365  |
| C | 0.012057  | -0.801945 | 3.878559  |
| C | 0.500382  | -0.502628 | 5.144259  |
| C | 1.398732  | 0.548287  | 5.321380  |
| C | 1.815830  | 1.295723  | 4.224255  |
| H | -0.715987 | -1.590829 | 3.730254  |
| H | 0.176685  | -1.089155 | 5.997975  |
| H | 1.680211  | 1.556269  | 2.091417  |
| H | 1.778913  | 0.777832  | 6.311797  |
| H | 2.529510  | 2.102873  | 4.353905  |
| C | -0.047612 | -0.381864 | 1.405492  |
| H | -0.032949 | -1.430720 | 1.112476  |
| O | -2.023085 | -0.723940 | 2.002650  |
| H | 0.154154  | 1.007440  | -1.526333 |
| C | -0.238111 | 0.178540  | -0.926023 |
| H | 0.346894  | -0.715723 | -1.175244 |
| N | -0.012142 | 0.520698  | 0.471177  |
| C | -1.711315 | -0.044427 | -1.289704 |
| H | -2.048611 | -0.944917 | -0.756314 |
| C | -1.816033 | -0.317489 | -2.789534 |
| H | -2.848217 | -0.541314 | -3.071340 |
| H | -1.498513 | 0.562547  | -3.359870 |
| H | -1.190424 | -1.162638 | -3.093884 |
| C | -2.579879 | 1.142957  | -0.877063 |
| H | -3.606876 | 1.001278  | -1.227209 |
| H | -2.606476 | 1.289137  | 0.206131  |
| H | -2.196449 | 2.068052  | -1.322071 |
| H | -0.162308 | 1.595888  | 0.784431  |
| H | -2.601608 | -0.898065 | 1.250744  |
| O | -0.657218 | 2.827790  | 1.250983  |
| H | -0.053999 | 3.314842  | 1.820899  |
| H | -1.461273 | 2.345863  | 1.906889  |
| O | -2.327969 | 1.624498  | 2.495213  |
| H | -2.208953 | 0.341804  | 2.285143  |
| H | -2.405719 | 1.822684  | 3.432698  |

**7'**

|   |           |           |           |
|---|-----------|-----------|-----------|
| C | 1.306114  | 1.098245  | 2.923962  |
| C | 0.571574  | -0.045232 | 2.592894  |
| C | 0.065566  | -0.860664 | 3.608297  |
| C | 0.253637  | -0.509642 | 4.942216  |
| C | 0.965065  | 0.644122  | 5.267942  |
| C | 1.500279  | 1.442400  | 4.256359  |
| H | -0.528033 | -1.729187 | 3.341001  |
| H | -0.161044 | -1.132434 | 5.727993  |
| H | 1.729655  | 1.698627  | 2.125060  |
| H | 1.112032  | 0.916097  | 6.308293  |
| H | 2.072893  | 2.328456  | 4.511124  |
| C | 0.286081  | -0.380930 | 1.184355  |
| H | 0.068987  | -1.434184 | 0.966193  |
| O | -2.420601 | -0.850987 | 1.930314  |
| H | 0.277160  | 0.830360  | -1.775161 |
| C | -0.092577 | 0.075687  | -1.070923 |
| H | 0.400445  | -0.876843 | -1.312585 |
| N | 0.258823  | 0.509683  | 0.278175  |
| C | -1.609635 | -0.082449 | -1.248450 |
| H | -1.919264 | -0.924533 | -0.615988 |
| C | -1.915988 | -0.403231 | -2.709896 |
| H | -2.983193 | -0.595839 | -2.850623 |
| H | -1.642361 | 0.440306  | -3.353841 |
| H | -1.365103 | -1.284041 | -3.055127 |
| C | -2.365515 | 1.156541  | -0.773555 |
| H | -3.429955 | 1.069048  | -1.014335 |
| H | -2.270611 | 1.281823  | 0.307392  |
| H | -1.984282 | 2.065151  | -1.253422 |
| H | -0.167150 | 2.212314  | 0.778593  |
| H | -3.307693 | -0.852769 | 1.557654  |
| O | -0.583338 | 3.011628  | 1.180602  |
| H | 0.140305  | 3.560090  | 1.497672  |
| H | -1.553710 | 2.217398  | 2.454470  |
| O | -2.025398 | 1.634438  | 3.086592  |
| H | -2.334973 | 0.030428  | 2.352915  |
| H | -1.373170 | 1.435456  | 3.769490  |

**8'**

|   |           |           |          |
|---|-----------|-----------|----------|
| C | -0.486704 | -1.063809 | 4.234107 |
| C | -0.932815 | -0.337894 | 3.128745 |
| C | -1.455658 | 0.947073  | 3.312066 |
| C | -1.527176 | 1.491896  | 4.586277 |

|   |           |           |           |
|---|-----------|-----------|-----------|
| C | -1.079216 | 0.761790  | 5.688465  |
| C | -0.559238 | -0.516769 | 5.511863  |
| H | -1.795683 | 1.494733  | 2.439146  |
| H | -1.933709 | 2.488517  | 4.726142  |
| H | -0.079244 | -2.061464 | 4.089830  |
| H | -1.137843 | 1.191194  | 6.683661  |
| H | -0.211533 | -1.086810 | 6.367365  |
| C | -0.839581 | -0.934140 | 1.781684  |
| H | -0.405081 | -1.947017 | 1.736851  |
| H | -0.629992 | -2.009636 | -0.421359 |
| C | -1.064616 | -0.999494 | -0.535091 |
| H | -2.058229 | -1.113079 | -0.986540 |
| N | -1.227435 | -0.328286 | 0.737486  |
| C | -0.182234 | -0.176787 | -1.481477 |
| H | -0.653258 | 0.808396  | -1.588406 |
| C | -0.117479 | -0.851113 | -2.850266 |
| H | 0.483134  | -0.261037 | -3.548115 |
| H | 0.344393  | -1.841873 | -2.769486 |
| H | -1.114021 | -0.978231 | -3.284027 |
| C | 1.214326  | 0.011754  | -0.893398 |
| H | 1.850039  | 0.589730  | -1.570338 |
| H | 1.171944  | 0.532685  | 0.066285  |
| H | 1.694015  | -0.961492 | -0.730920 |
